# Supplementary material for: Efficient inversions and duplications of mammalian regulatory DNA elements and gene clusters by CRISPR/Cas9
Source: PubMed Central journal article supplement — J Mol Cell Biol. 2015 Mar 10;7(4):284–98. doi: 10.1093/jmcb/mjv016 (PMC4524425; doi:10.1093/jmcb/mjv016), 2015-03-10
Supplement: supp_mjv016_mjv016supp.pdf [file supp_mjv016_mjv016supp.pdf]

**Efficient Inversions and Duplications of Mammalian Regulatory  
DNA Elements and Gene Clusters by CRISPR/Cas9**

**Online Supplementary Materials:**

**Supplementary Figures S1-S14**

**Supplementary Tables S1-S6**

## Supplementary Figures

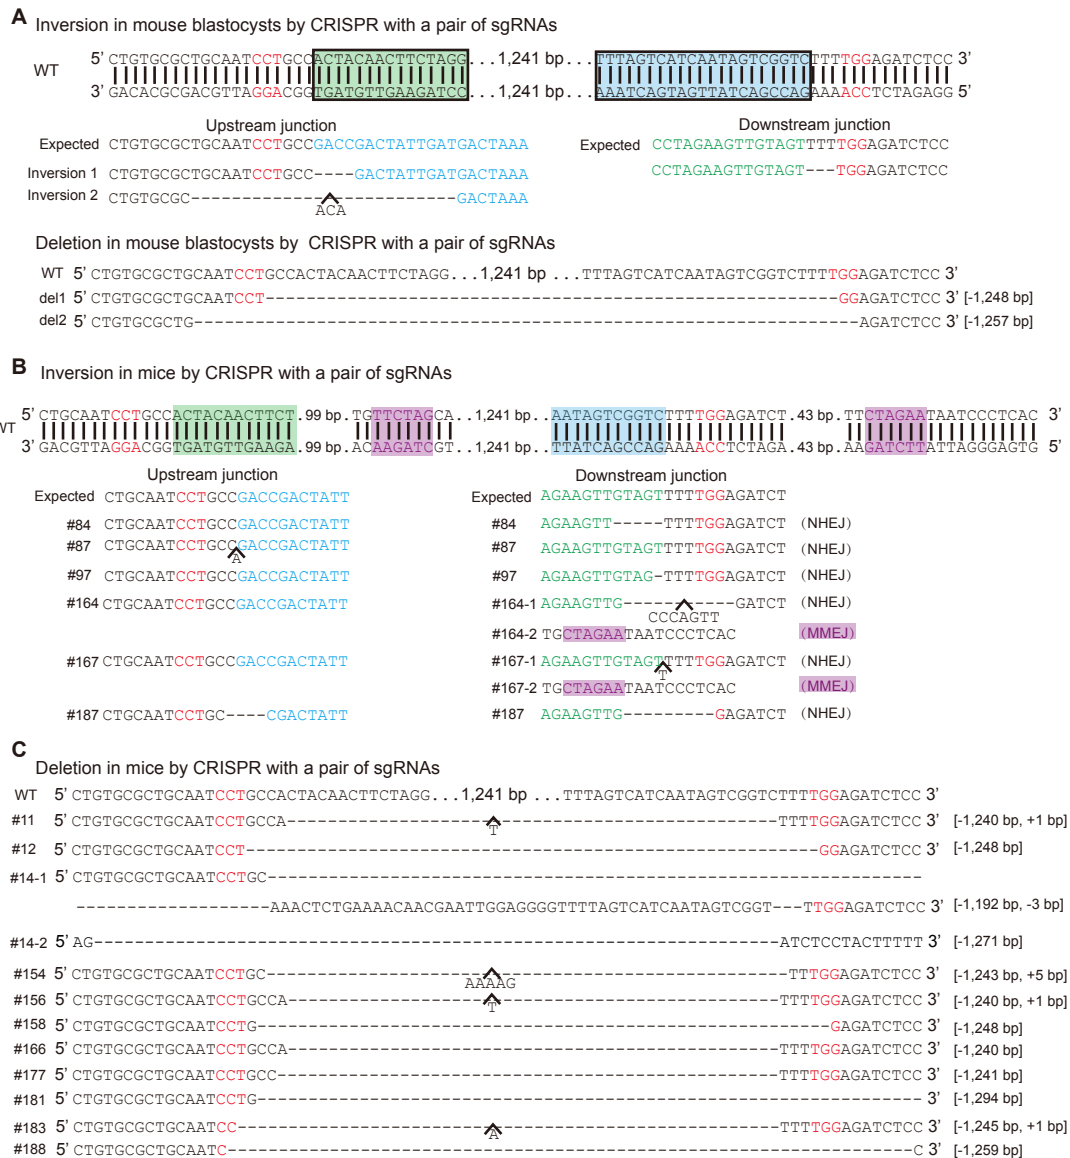

**Supplementary Figure S1.** Inversion and deletion of a 1,241-bp DNA fragment by CRISPR with a pair of sgRNAs in mice. Shown are sequences of the upstream and downstream inversion junctions as well as deletion junctions in mouse blastocysts (A). Sequences of the upstream and downstream inversion junctions (B) and deletion junction (C) in the F0 founder mice are also shown. The nucleotides highlighted in purple in (B) indicate the inverted repeats used by MMEJ. Repair by the MMEJ pathway results in the inversion of the DNA fragment and simultaneous deletions of the sequences between the repeat and the DSB near both the upstream and downstream breaks.

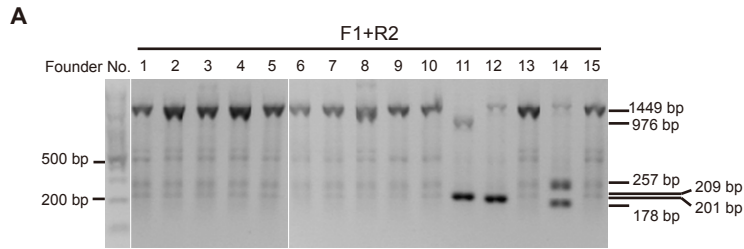

**B**

WT 5' GTGCGCTGCAATCCTGCCACTACAACCTTAGGCTTGCT. . . . .AATAGTCGGTCTTTTGGAGATCTCCTACTTTTT 3'

#1 5' GTGCGCTGCAATCCTGCCACTACAACCTTAGGCTTGCT. . . . .AATAGTCGGTCTTTTGGAGATCTCCTACTTTTT 3'

#2 5' GTGCGCTGCAATCCTGCCACTACAACCTTAGGCTTGCT. . . . .AATAGTCGGTCTTTTGGAGATCTCCTACTTTTT 3'

#3-1 5' GTGCGCTGCAATCCTGCCACTACAACCTTAGGCTTGCT. . . . .-----33 bp del----ATCTCCTACTTTTT 3'

#3-2 5' GTGC-----ACTACAACCTTAGGCTTGCT. . . . .-----33 bp del----ATCTCCTACTTTTT 3'

#3-3 5' GTGCGCTGCAATCCTGCCACTACAACCTTAGGCTTGCT. . . . .AATAGT-----62 bp del----- 3'

#4-1 5' GTGCGCTGCAATCCTGCCACTACAACCTTAGGCTTGCT. . . . .AATAGTCGGTC-----CTACTTTTT 3'

#4-2 5' GTGCGCTGCAATCCTGCCACTACAACCTTAGGCTTGCT. . . . .AATAGTCGGTCTTTTGGAGATCTCCTACTTTTT 3'

#4-3 5' GTGCGCTGCAATCCTGCCACTACAACCTTAGGCTTGCT. . . . .AATAGTCGGTCTTTTGGAGATCTCCTACTTTTT 3'

#5 5' GTGCGCTGCAATCCTGCCACTACAACCTTAGGCTTGCT. . . . .AATAGTCGGTCTTTTGGAGATCTCCTACTTTTT 3'

#6-1 5' GTGCGCTGCAATCCTGC-----AACTTCTAGGCTTGCT. . . . .AATAGTCGGTCTTTTGGAGATCTCCTACTTTTT 3'

#6-2 5' GTGCGCTGCAATCCTGC-----AACTTCTAGGCTTGCT. . . . .AATAGTCGGT--TTGGAGATCTCCTACTTTTT 3'

#6-3 5' GTGCGCTGCAATCCTGCCACTACAACCTTAGGCTTGCT. . . . .AATAGTCGGT--TTGGAGATCTCCTACTTTTT 3'

#7-1 5' GTGCGCTGCAATCCTGCCACTACAACCTTAGGCTTGCT. . . . .AATAGTCGGTCTTTTGGAGATCTCCTACTTTTT 3'

#7-2 5' GTGCGCTGCAATCCTGCCACTACAACCTTAGGCTTGCT. . . . .AATAGTCGGTCTTTTGGAGATCTCCTACTTTTT 3'

#8-1 5' GTGCGCTGCAATCCTG-----226 bp del----- . . . . .AATAGTCGGTCTTTTGGAGATCTCCTACTTTTT 3'

#8-2 5' GTGCGCTGCAATCCTG-----226 bp del----- . . . . .AATAGTCGGTCTTTTGGAGATCTCCTACTTTTT 3'

#8-3 5' GTGCGCTGCAATCCTG-----226 bp del----- . . . . .AATAGTCGGTCT-----CCTACTTTTT 3'

#9 5' GTGCGCTGCAATCCTGCCA----ACTTCTAGGCTTGCT. . . . .AAT-----TTTGGAGATCTCCTACTTTTT 3'

#10-1 5' GTGCGCTGCAATCCTGCCACTACAACCTTAGGCTTGCT. . . . .AATAGTCGGT--TTTGGAGATCTCCTACTTTTT 3'

#10-2 5' GTGCGCTGCAATCCTGCCACTACAACCTTAGGCTTGCT. . . . .AATAGTCGG-----AGATCTCCTACTTTTT 3'

#11 5' GTGCGCTGCAATCCTGCCACTACAACCTTAGGCTTGCT. . . . .-----473 bp del----- 3'

#12 5' GTGCGCTGCAATCCTGCCACTACAACCTTAGGCTTGCT. . . . .AATAGTCGGTCTTTTGGAGATCTCCTACTTTTT 3'

#13-1 5' GTGCGCTGCAATCCTGCCACTACAACCTTAGGCTTGCT. . . . .AATAGTCGG-----AGATCTCCTACTTTTT 3'

#13-2 5' GTGCGCTGCAATCCTGCCACTACAACCTTAGGCTTGCT. . . . .AATAGTCGGT--TTGGAGATCTCCTACTTTTT 3'

#14 5' GTGCGCTGCAATCCTGCCACTACAACCTTAGGCTTGCT. . . . .AATAGTCGGTCTTTTGGAGATCTCCTACTTTTT 3'

#15-1 5' GTGCGCTGCAATCCTGCCACTACAACCTTAGGCTTGCT. . . . .AATAGTCGG--TTTGGAGATCTCCTACTTTTT 3'

#15-2 5' GTGCGCTGCAATCCTGCCACTACAACCTTAGGCTTGCT. . . . .AATAGTCGG--TTTGGAGATCTCCTACTTTTT 3'

**Supplementary Figure S2.** Sequences of indels at the two targeted sites by CRISPR with a pair of sgRNAs in the F0 founder mice. (A) Genotyping of the 15 F0 founder mice. (B) Sequences of alleles of indels at the two targeted sites of the 15 F0 founder mice.

**A** Inversion in mice by CRISPR with a pair of sgRNAs

WT 5' GGGGGGGTGGG. 47 bp. TGCTCGCCCTCGTGGTTAAAGATGGA... 960 bp. . AAAAAGTGGTTCCTGCCACCTGGTGT. 187 bp. TCCCTCACTACCACCAAG 3'  
 3' CCCCCACCAAC. 47 bp. ACAGAGCGGGAGACGACCAATTTCTACACT... 960 bp. . TTTTTCACCAAGGTAGACGGTGGACCACAA. 187 bp. AGGGAGTGAATGGGCTTC 5'

Upstream junction by NHEJ

Expected GGGGGTGGTGGT. 47 bp. TGCTCGCCCTCAGATGGAACCACCTTTT

#39 GGGGGTGGTGGT. 47 bp. TGCTCGCCCTCAGATGGAACCACCTTTT

#43 GGGGGTGGTGGT. 47 bp. TGCTCGCCCTCAGATGGAACCACCTTTT

#44 GGGGGTGGTGGTGG---GGTGGGGTGGTGGTGGTTCTAGCACTGAAAACGCAGCTGTCTCGCCCTCAGATGGAACCACCTTTT

Upstream junction by MMEJ

#40 GGGGGTGGT---63 bp deletion---AGTGAGGGATTATTTCTAGAAAAATCAGGATTCCTATATGCTCCTAGATGGCTCTAAAAAGTAGGAGATCTCC  
 AAAAGACCGACTATTGATGACTAAAACCCCTCCAATTCGTTGTTTCAGAGTTTAAAGTAATCTTAAAGTAATTTTGAACCTTCATAACTAGCCT  
 TTCCCTCATCTCCAGCACTTTCCCTCATCGAACACCAG-----ATGGAACCACCTTTT [ -70 bp, +204 bp]

#41 GGGGGTGGT---63 bp deletion---AGTGAGGGATTATTTCTAGAAAAATCAGGATTCCTATATGCTCCTAGATGGCTCTAAAAAGTAGGAGATCTCC  
 AAAAGACCGACTATTGATGACTAAAACCCCTCCAATTCGTTGTTTCAGAGTTTAAAGTAATCTTAAAGTAATTTTGAACCTTCATAACTAGCCT  
 TTCCCTCATCTCCAGCACTTTCCCTCATCGAACACCAGGTG-----GAACCACCTTTT [ -70 bp, +207 bp]

#42-1 GGGGGTGGT---63 bp deletion---AGTGAGGGATTATTTCTAGAAAAATCAGGATTCCTATATGCTCCTAGATGGCTCTAAAAAGTAGGAGATCTCC  
 AAAAGACCGACTATTGATGACTAAAACCCCTCCAATTCGTTGTTTCAGAGTTTAAAGTAATCTTAAAGTAATTTTGAACCTTCATAACTAGCCT  
 TTCCCTCATCTCCAGCACTTTCCCTCATCGAACACCAGGTG---AGATGGAACCACCTTTT [ -64 bp, +208 bp]

#42-2 GGGGGTGGT---63 bp deletion---AGTGAGGGATTATTTCTAGAAAAATCAGGATTCCTATATGCTCCTAGATGGCTCTAAAAAGTAGGAGATCTCC  
 AAAAGACCGACTATTGATGACTAAAACCCCTCCAATTCGTTGTTTCAGAGTTTAAAGTAATCTTAAAGTAATTTTGAACCTTCATAACTAGCCT  
 TTCCCTCATCTCCAGCACTTTCCCTCATCGAACACCAGGTGAGATGGAACCACCTTTT [ -63 bp, +209 bp, m1 bp]

#45-1 GGGGGTGGT---63 bp deletion---AGTGAGGGATTATTTCTAGAAAAATCAGGATTCCTATATGCTCCTAGATGGCTCTAAAAAGTAGGAGATCTCC  
 AAAAGACCGACTATTGATGACTAAAACCCCTCCAATTCGTTGTTTCAGAGTTTAAAGTAATCTTAAAGTAATTTTGAACCTTCATAACTAGCCT  
 TTCCCTCATCTCCAGCACTTTCCCTCATCGAACACCAGGTGAGATGGAACCACCTTTT [ -63 bp, +209 bp, m2 bp]

#45-2 GGGGGTGGT---63 bp deletion---AGTGAGGGATTATTTCTAGAAAAATCAGGATTCCTATATGCTCCTAGATGGCTCTAAAAAGTAGGAGATCTCC  
 AAAAGACCGACTATTGATGACTAAAACCCCTCCAATTCGTTGTTTCAGAGTTTAAAGTAATCTTAAAGTAATTTTGAACCTTCATAACTAGCCT  
 TTCCCTCATCTCCAGCACTTTCCCTCATCGAACACCAGGTGGCAGATGGAACCACCTTTT [ -63 bp, +209 bp]

#46 GGGGGTGGT---63 bp deletion---AGTGAGGGATTATTTCTAGAAAAATCAGGATTCCTATATGCTCCTAGATGGCTCTAAAAAGTAGGAGATCTCC  
 AAAAGACCGACTATTGATGACTAAAACCCCTCCAATTCGTTGTTTCAGAGTTTAAAGTAATCTTAAAGTAATTTTGAACCTTCATAACTAGCCT  
 TTCCCTCATCTCCAGCACTTTCCCTCATCGAACACCAGGTGGCAGATGGAACCACCTTTT [ -63 bp, +209 bp]

Downstream junction

Expected TCACATCTTTAACCAGCAGCCACCTGGTGT. 187 bp. TCCCTCACTACCACCAAG

#39-1 TCACATCTTTAACCAGCAGCCACCTGGTGT. 187 bp. TCCCTCACTACCACCAAG

#39-2 TCACATCTTTAACCAGCAGCCACCTGGTGT. 187 bp. TCCCTCACTACCACCAAG

#40-1 TCACATCTTTAACCAGCAGCCACCTGGTGT. 187 bp. TCCCTCACTACCACCAAG

#40-2 TCACATCTTTAACCAGCAGCCACCTGGTGT. 187 bp. TCCCTCACTACCACCAAG

#41 TCACATCTTTAACCAGCAGCCACCTGGTGT. 187 bp. TCCCTCACTACCACCAAG

#42 TCACATCTTTAACCAGCAGCCACCTGGTGT. 187 bp. TCCCTCACTACCACCAAG

#43 TCACATCTTTAACCAGCAGCCACCTGGTGT. 187 bp. TCCCTCACTACCACCAAG

#44 TCACATCTTTAACCAGCAGCCACCTGGTGT. 187 bp. TCCCTCACTACCACCAAG

#45 TCACATCTTTAACCAGCAGCCACCTGGTGT. 187 bp. TCCCTCACTACCACCAAG

#46-1 TCACATCTTTAACCAGCAGCCACCTGGTGT. 187 bp. TCCCTCACTACCACCAAG

#46-2 TCACATCTTTAACCAGCAGCCACCTGGTGT. 187 bp. TCCCTCACTACCACCAAG

#46-3 TCACATCTTTAACCAGCAGCCACCTGGTGT. 187 bp. TCCCTCACTACCACCAAG

**B** Deletion in mice by CRISPR with a pair of sgRNAs

WT 5' GCTGTCTCGCCCTCTGCTGGTTAAAGATGGA... 960 bp. . AAAAAGTGGTTCCTGCCACCTGGTGTTCGATG 3'  
 #39-1 5' GCTGTCTCGCCCTC-----GCCACCTGGTGTTCGATG 3' [-960 bp]  
 #39-2 5' GCTGTCTCGCCCTC-----CTGGTGTTCGATG 3' [-965 bp]  
 #40-1 5' GCTGTCTCGCCCTC-----GCCACCTGGTGTTCGATG 3' [-960 bp]  
 #40-2 5' GCTGTCTCGCCCTC-----GCCACCTGGTGTTCGATG 3' [-959 bp, +1 bp]  
 #41 5' GCTGTCTCGC-----GGTGTTCGATG 3' [-971 bp, +2 bp]  
 #43 5' GCTGTCTCGCCCTC-----GCCACCTGGTGTTCGATG 3' [-960 bp]  
 #44 5' GCTGTCTCGCCCTC-----GCCACCTGGTGTTCGATG 3' [-960 bp]  
 #45-1 5' GCTGTCTCGCCCTC-----GCCACCTGGTGTTCGATG 3' [-960 bp]  
 #45-2 5' GCTGTCTCGC-----CTGGTGTTCGATG 3' [-969 bp]

**Supplementary Figure S3.** Inversion and deletion of a 960-bp DNA fragment by CRISPR with a pair of sgRNAs in the F0 founder mice. (A) Sequences of the upstream and downstream inversion junctions in F0 founder mice. The nucleotides highlighted in purple indicate the inverted repeats used by MMEJ. Repair by the MMEJ pathway results in the inversion of the DNA fragment between the upstream breakpoint and downstream microhomologous repeat as well as the simultaneous deletion of the sequences between the upstream microhomologous repeat and upstream breakpoint. (B) Sequences of the deletion junctions in F0 founder mice.

**A** Inversion in mice by CRISPR with a pair of sgRNAs

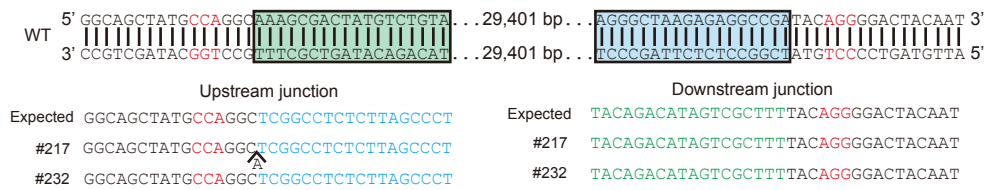

**B** Deletion in mice by CRISPR with a pair of sgRNAs

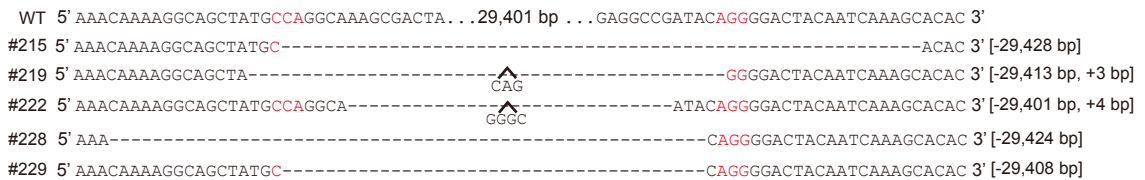

**Supplementary Figure S4.** Inversion and deletion of a 29,401-bp DNA fragment by CRISPR with a pair of sgRNAs in F0 founder mice. (A) Sequences of the upstream and downstream inversion junctions in F0 founder mice. (B) Sequences of the deletion junctions in F0 founder mice.

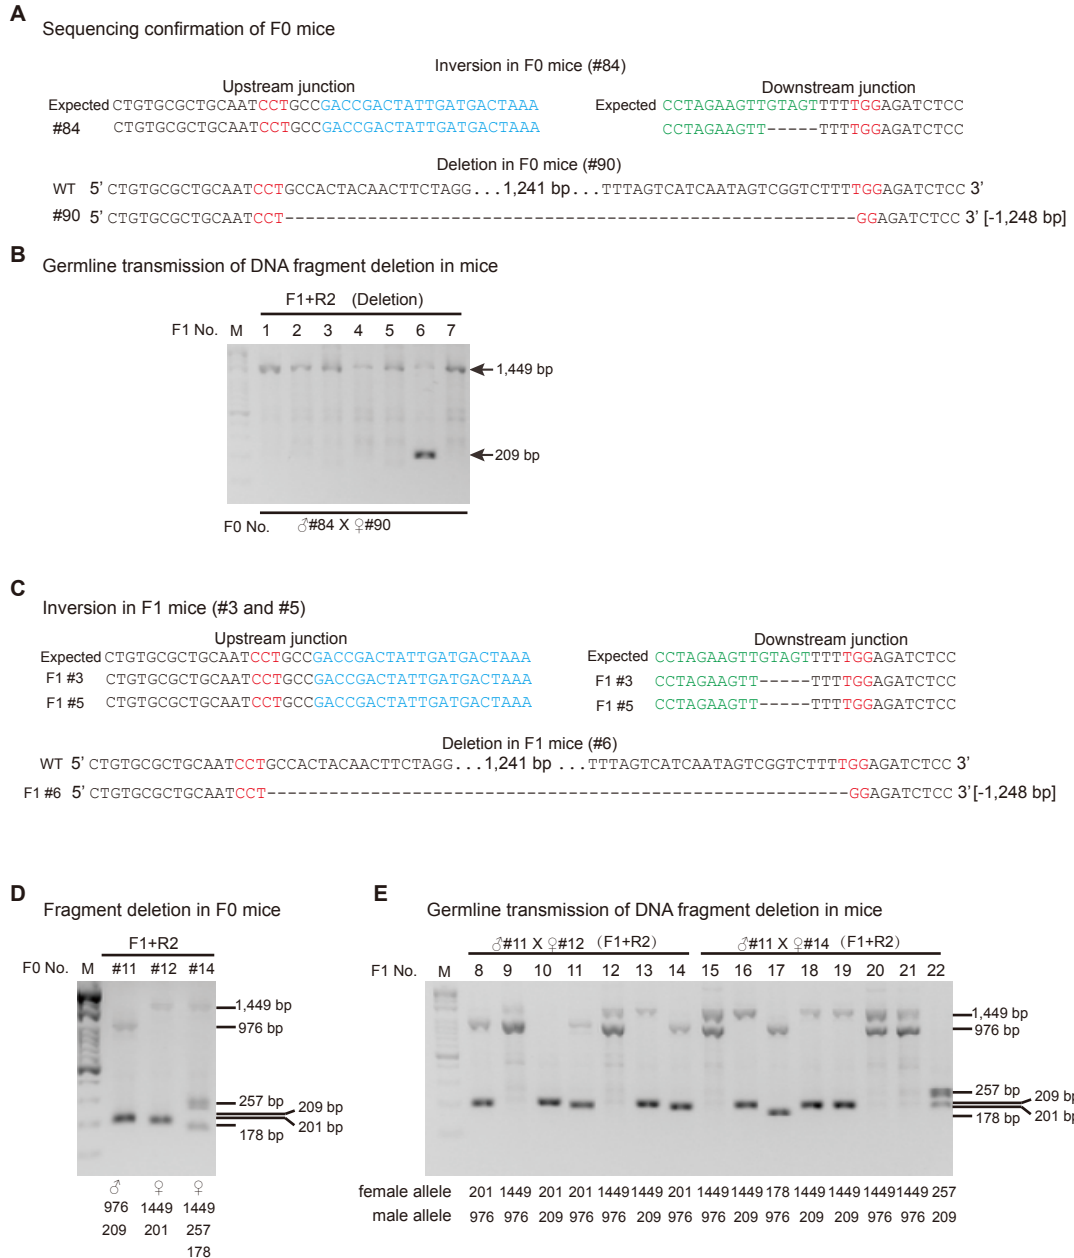

**Supplementary Figure S5.** Germline transmission in mice of the DNA-fragment inversion and deletion induced by CRISPR with a pair of sgRNAs. (A) Sequencing of alleles of inversion and deletion junctions in F0 mice. (B) Genotyping of DNA fragment deletion in F1 mice from crossing of two F0 founder mice. (C) Sequencing of alleles of inversion and deletion junctions in F1 mice. (D) Genotyping of DNA fragment deletion in F0 founder mice. (E) F1 genotyping demonstrates the germline transmission of the deletion alleles.

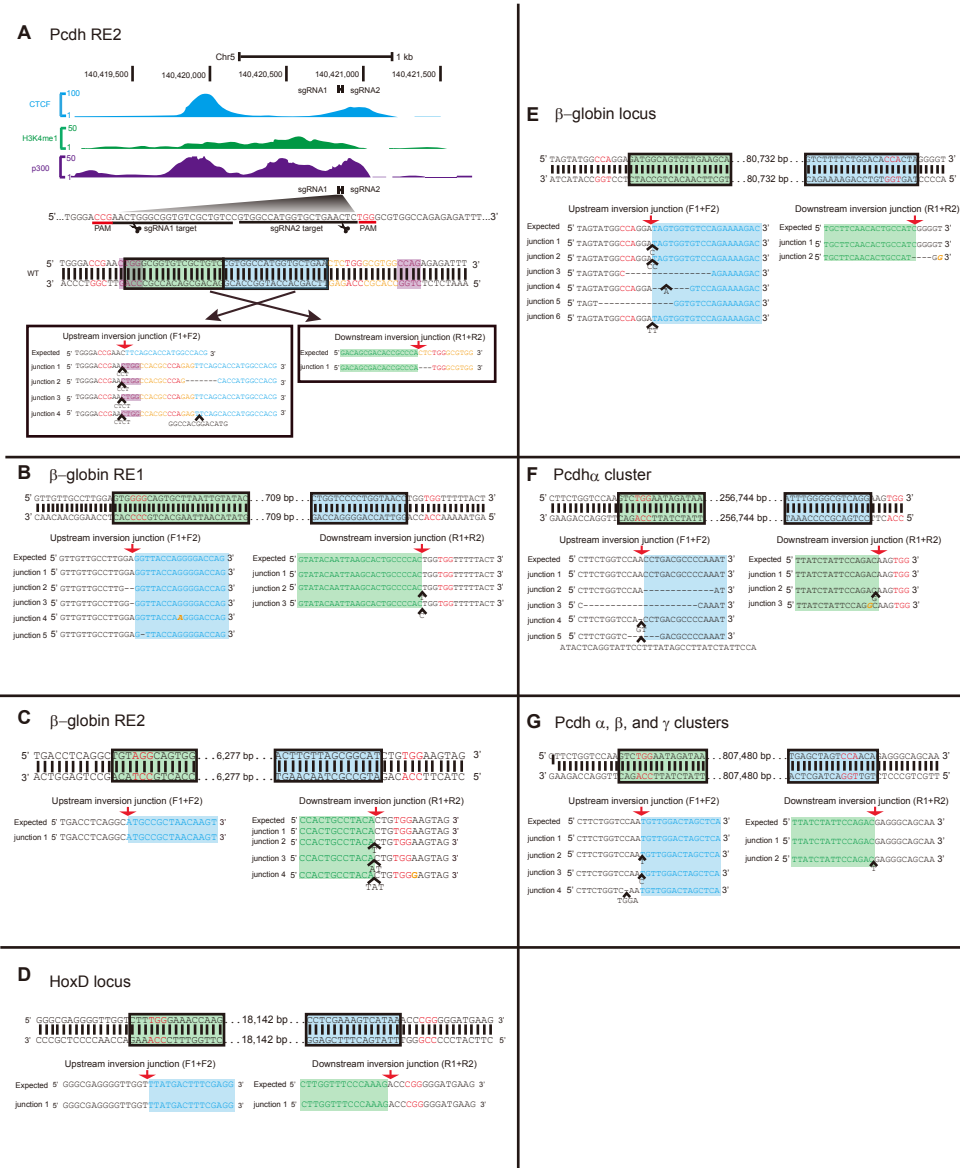

**Supplementary Figure S6. Inversions of a set of DNA fragments of different sizes in human cell.** (A) Inversion of a 35-bp DNA fragment of the *Pcdh* regulatory element 2 (RE2) by CRISPR with a pair of sgRNAs. Shown are diagram of CRISPR with a pair of sgRNAs. The sgRNAs targeting sequences are underlined. The PAM sequences are highlighted in red. The ChIP-seq signals of CTCF, H3K4me1, and p300 are obtained from the Human ENCODE Project. The sequences of the upstream and downstream inversion junctions are also shown. The nucleotides highlighted in purple indicate the inverted repeats used by the microhomology-mediated end joining (MMEJ) repair pathway. Repair by the MMEJ pathway results in the inversion of the DNA fragment between the upstream breakpoint and downstream microhomologous repeat. Shown are also sequences of the upstream and downstream inversion junction of 709-bp (B) and 6,277-bp (C) DNA fragments at the *β-globin* locus, of an 18,142-bp DNA fragment at the *HoxD* locus (D), of an 80,732-bp DNA fragment at the *β-globin* locus (E), of a 256,744-bp DNA fragment covering the *Pcdhα* gene cluster (F), and of an 807,480-bp DNA fragment covering the *Pcdh α, β, and γ* gene clusters (G).

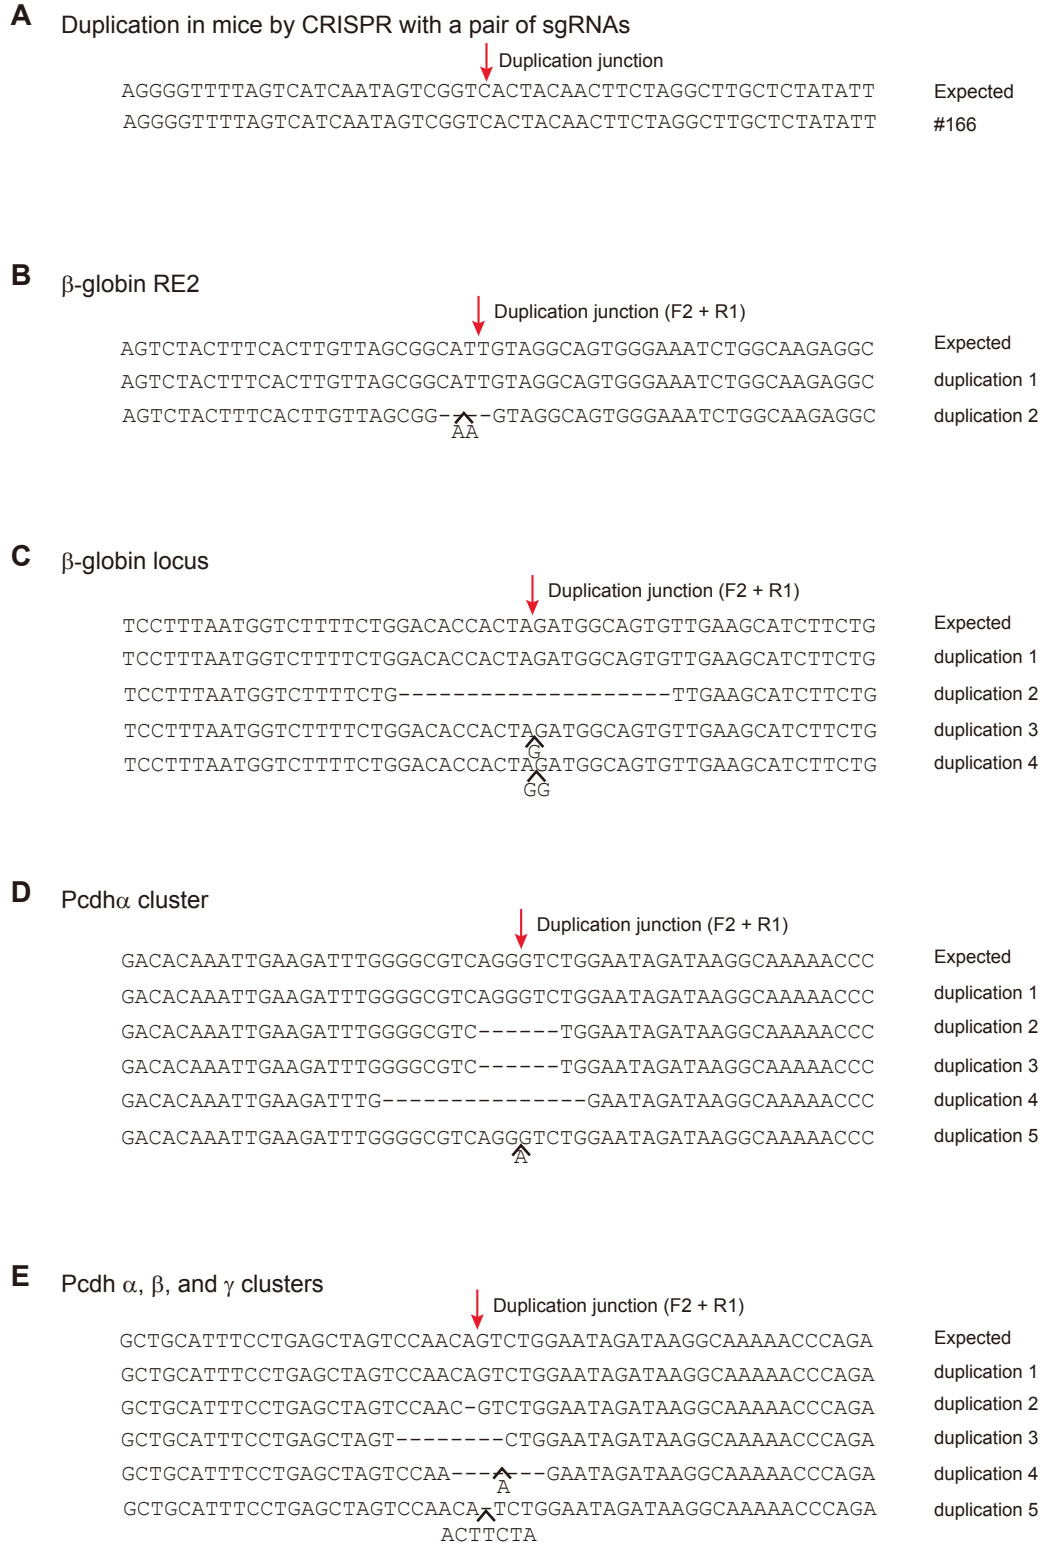

**Supplementary Figure S7.** Sequences of duplication junctions by CRISPR through *trans*-allelic recombination in mice and human cells. Shown are sequences of duplication junctions of 1,241-bp DNA fragment (A) in mouse, of 6,277-bp (B) and 80,732-bp (C) DNA fragments at the  $\beta$ -globin locus, of a 256,744-bp DNA fragment covering the  $Pcdh\alpha$  gene cluster (D), and of an 807,480-bp DNA fragment covering the  $Pcdh$   $\alpha$ ,  $\beta$ , and  $\gamma$  gene clusters (E) in human cells.



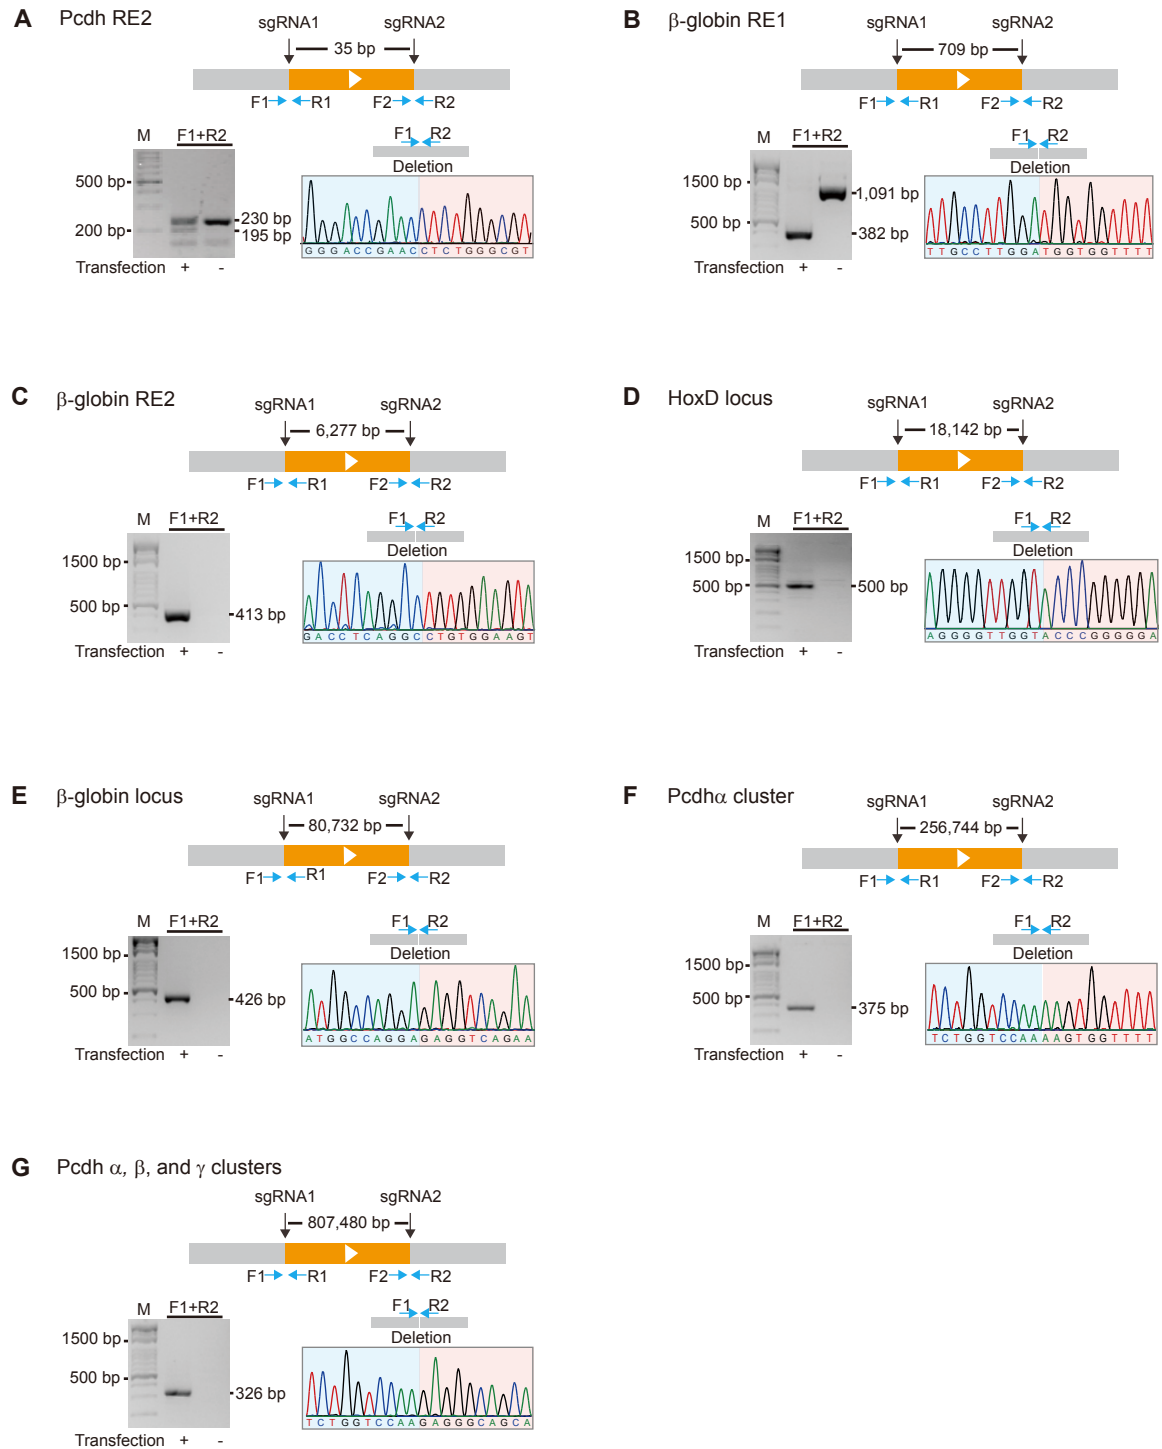

**Supplementary Figure S8.** Targeted deletions of seven additional DNA fragments of different sizes. (A) Deletion of the *Pcdh* RE2. The deletion junctions are identified by PCR with specific primer pairs. The PCR product is cloned and sequenced. An example of the sequence chromatograms at the deletion junctions is shown. Deletion of 709-bp (B) and 6,277-bp (C) DNA fragments at the *β-globin* locus. (D) Deletion of an 18,142-bp DNA fragment at the *HoxD* locus. (E) Deletion of an 80,732-bp DNA fragment at the *β-globin* locus. (F) Deletion of a 256,744-bp DNA fragment covering the *Pcdhα* gene cluster. (G) Deletion of an 807,480-bp DNA fragment covering the *Pcdh α, β, and γ* gene clusters.

**A** Pcdh RE2

5' TCTGCAGCGAGTCATGGGACCGAACTGGGCGGTGTCGCTGTCCTGGCCATGGTGTGAACCTGGGCGTGGCCAGAGAGAT 3' WT  
 5' TCTGCAGCGAGTCATGGGACCGAACTGGGCGGTG-----CTCTGGGCGTGGCCAGAGAGAT 3' [-26 bp]  
 5' TCTGCAGCGAGTCATGGGACCGAACTGGGCGGTG-----TCTGGGCGTGGCCAGAGAGAT 3' [-27 bp]  
 5' TCTGCAGCGAGTCATGGGACCGAACT-----CTCTGGGCGTGGCCAGAGAGAT 3' [-34 bp]  
 5' TCTGCAGCGAGTCATGGGACCGAAC-----CTCTGGGCGTGGCCAGAGAGAT 3' [-35 bp]  
 5' TCTGCAGCGAGTC-----CTCTGGGCGTGGCCAGAGAGAT 3' [-47 bp, +1 bp]

**B**  $\beta$ -globin RE1

5' GTTGTGTCCTGGAGTGGGGCAGTGTCTAATTGTATAC...668 bp...CTGGTCCCCTGGTAACCTGGTGGTTTTTTACT 3' WT  
 5' GTTGTGTCCTTGG-----TGGTGGTTTTTTACT 3' [-709 bp]  
 5' GTTGTGTCCTTGG-----GGTGGTTTTTTACT 3' [-711 bp]

**C**  $\beta$ -globin RE2

5' GCAGACCCAATGACCTCAGGCTGTAGGCAGTGG...6,242 bp...CTACTTTCACTTGTAGCGGCATCTGTGGGAAGTAG 3' WT  
 5' GCAGACCCAATGACCTCAGGC-----CTGTGGGAAGTAG 3' [-6,277 bp]  
 5' GC-----TAG 3' [-6,305 bp]  
 5' GCAGACCCAATGACCTCAGGCT-----CTGTGGGAAGTAG 3' [-6,276 bp]  
 5' GCAG-----TAG 3' [-6,303 bp]

**D** HoxD locus

5' GAGGGGTGGTCTTTGGGAA...18,121 bp...GAAAGTCATAAAACCCGGGGGATGAAGTGGGAAGACTGTCCAAGGAG 3' WT  
 5' GAGGGGTGGT-----ACCCGGGGGATGAAGTGGGAAGACTGTCCAAGGAG 3' [-18,142 bp]  
 5' GA-----GGGGGATGAAGTGGGAAGACTGTCCAAGGAG 3' [-18,155 bp]  
 5' GAGG-----AG 3' [-18,182 bp]  
 5' GAGGGGTGGT-----ATGAAGTGGGAAGACTGTCCAAGGAG 3' [-18,151 bp]

**E**  $\beta$ -globin locus

5' TAGTATGGCCAGGAGATGGCAGTGTGA...80,695 bp...TCTGGACACCACTAGGGGTGAGAAAGTAGTTCATCAAAAC 3' WT  
 5' TAGTATGGCCAGGA-----GAGGTCAGAAGTAGTTCATCAAAAC 3' [-80,723 bp]  
 5' TAGTATGG-----TCAGAAGTAGTTCATCAAAAC 3' [-80,733 bp]  
 5' TAGTATGGCC-----GT-----GTCAGAAGTAGTTCATCAAAAC 3' [-80,730 bp, +2 bp]  
 5' TAGTATGGCCAGGA-----AGTAGTTCATCAAAAC 3' [-80,732 bp]  
 5' TAGTATGGCCA-----TCATACTAGTTCATCAAAAC-----TAGTTCATCAAAAC 3' [-80,737 bp, +18 bp]

**F** Pcdh $\alpha$  cluster

5' TCTGGTCCAAGTCTGGAAATAGATAAGGCCAAAACCC...256,702 bp...AGATTGGGGCGTCAGGAAGTGGTTTTTT 3' WT  
 5' TCTGGTCCAA-----AAGTGGTTTTTT 3' [-256,744 bp]  
 5' TCTGGTCCAA-----AA-----AAGTGGTTTTTT 3' [-256,744 bp, +2 bp]  
 5' TCTGGTCC-----AGTGGTTTTTT 3' [-256,747 bp]  
 5' TCTGGT-----T 3' [-256,759 bp]

**G** Pcdh  $\alpha$ ,  $\beta$ , and  $\gamma$  clusters

5' TCTGGTCCAAGTCTGGAAATAGATAAGGCCAAAACCC...807,429 bp...TGAGCTAGTCCACAGAGGGCAGCAACAA 3' WT  
 5' TCTGGTCCAA-----GAGGGCAGCAACAA 3' [-807,480 bp]  
 5' TCTGGTCCAA-----AA 3' [-807,492 bp]  
 5' TCTGGTCCAA-----CACTA-----GGCAGCAACAA 3' [-807,483 bp, +5 bp]  
 5' TCTGGTCC-----GATGGAAC-----CAGCAACAA 3' [-807,486 bp, +8 bp]

**Supplementary Figure S9.** Sequences of deletion junctions of the seven additional DNA fragments. Shown are sequences of deletion junction of a 35-bp DNA fragment of the *Pcdh* RE2 (A), of 709-bp (B) and 6,277-bp (C) DNA fragments at the  $\beta$ -globin locus, of an 18,142-bp DNA fragment at the *HoxD* locus (D), of an 80,732-bp DNA fragment at the  $\beta$ -globin locus (E), of a 256,744-bp DNA fragment covering the *Pcdh* $\alpha$  gene cluster (F), and of an 807,480-bp DNA fragment covering the *Pcdh*  $\alpha$ ,  $\beta$ , and  $\gamma$  gene clusters (G).

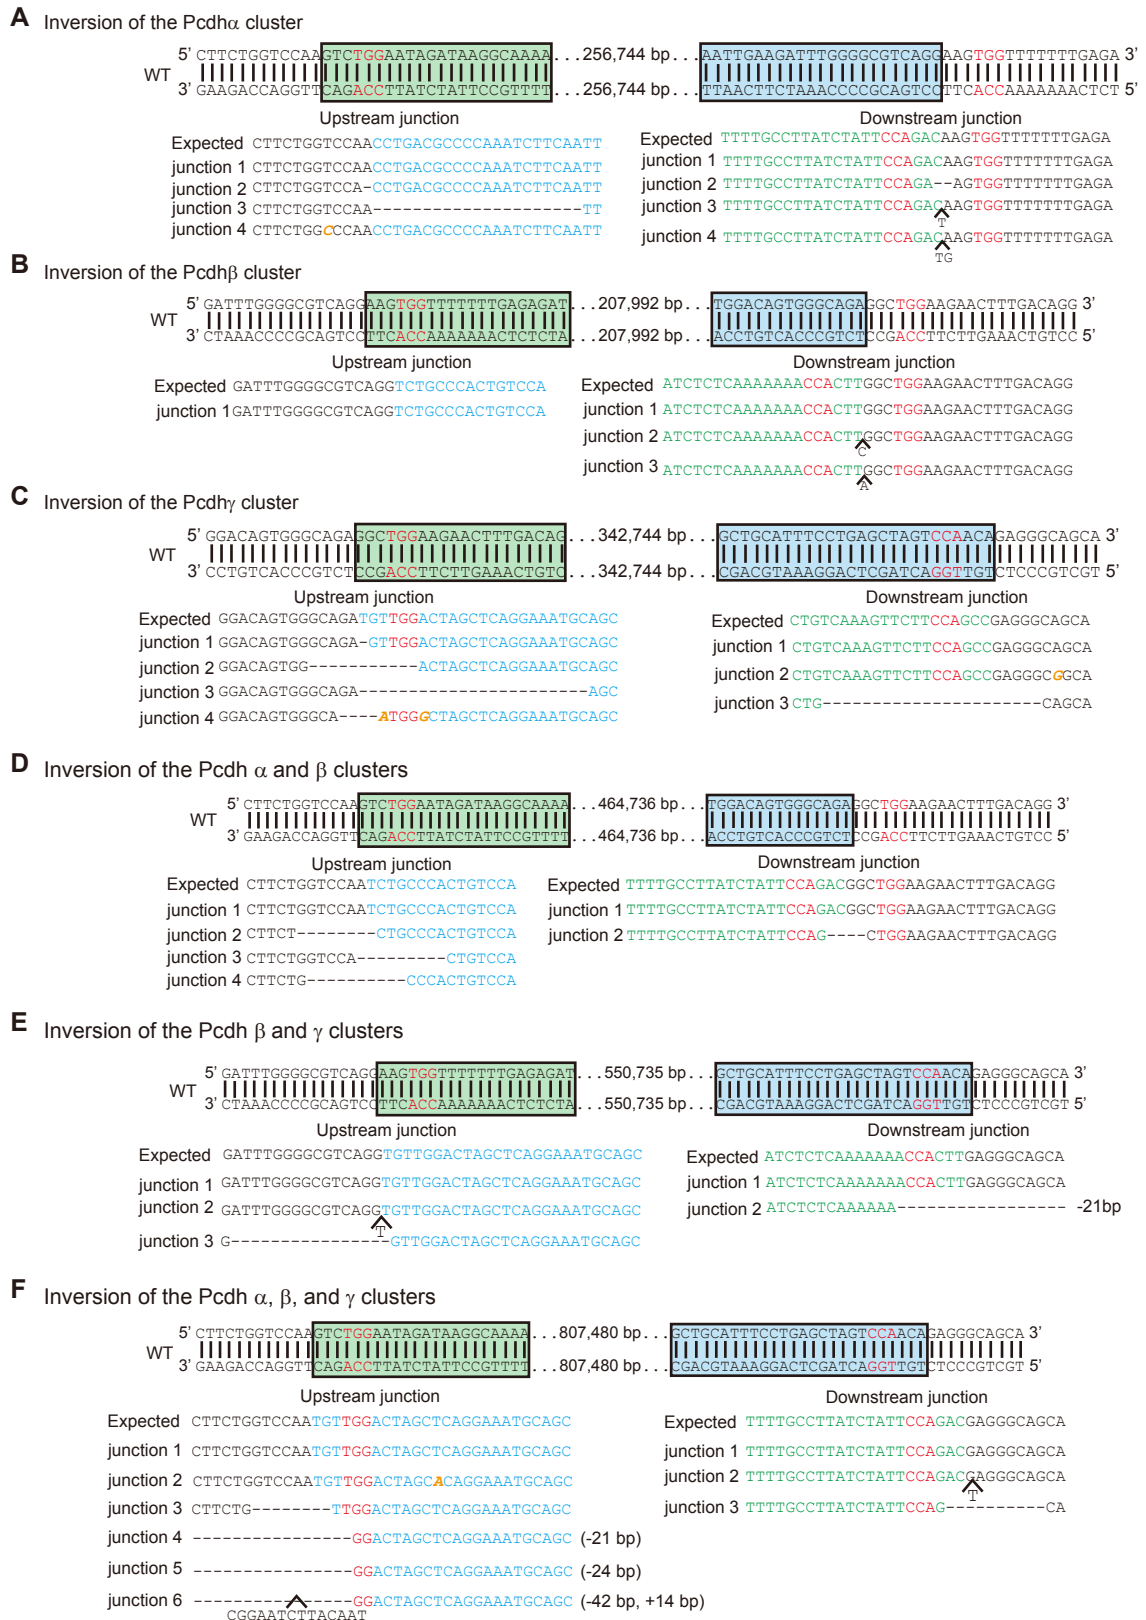

**Supplementary Figure S10.** Sequences of the upstream and downstream junctions of combinatorial inversions of the *Pcdh*  $\alpha$ ,  $\beta$ , and  $\gamma$  gene clusters induced by CRISPR with four sgRNAs. Shown are the sequences of the upstream and downstream inversion junctions of the *Pcdh*  $\alpha$  (A),  $\beta$  (B),  $\gamma$  (C),  $\alpha/\beta$  (D),  $\beta/\gamma$  (E), and  $\alpha/\beta/\gamma$  (F) gene clusters.

**A** Duplication of the *Pcdh $\alpha$*  cluster

↓ Duplication junction

```
CACAAATTGAAGATTTGGGGCGTCAGGGTCTGGAAATAGATAAGGCCAAAAACCCAGAGATTTCCACC Expected duplication
CACAAATTGAAGATTTGGGGCGTCAGGGTCTGGAAATAGATAAGGCCAAAAACCCAGAGATTTCCACC junction 1
CACAAATTGAAGAT-----CTGGAAATAGATAAGGCCAAAAACCCAGAGATTTCCACC junction 2
CACAAATTGAAGATTTGGGGCGTCAG-----AGATTTCCACC junction 3
CACAAATTGAAGATTTGGGGCGTCAGGGTCTGGAAATAGATAAGGCCAAAAACCCAGAGATTTCCACC junction 4
      A
```

**B** Duplication of the *Pcdh $\beta$*  cluster

↓ Duplication junction

```
TGTGCAGATGGCTTCTGAATTGGACAGTGGGCAGAAAAGTGGTTTTTTTTGAGAGATCTGCCTATTT Expected duplication
TGTGCAGATGGCTTCTGAATTGGACAGTGGGCAGAAAAGTGGTTTTTTTTGAGAGATCTGCCTATTT junction 1
TGTGCAGATGGCTTCTGAATTGGACAGTGGGCAGAAAAGTGGTTTTTTTTGAGAGATCTGCCTATTT junction 2
TGTGCAGATGGCTTCTGAATTGGACAGTGGGCAGAAAAGTGGTTTTTTTTGAGAGATCTGCCTATTT junction 3
      AG
TGTGCAGATGGCTTCTGAATTGGACAGTGGGCAGAAAAGTGGTTTTTTTTGAGAGATCTGCCTATTT junction 4
      ATTGGAC
```

**C** Duplication of the *Pcdh $\gamma$*  cluster

↓ Duplication junction

```
TTTCCTGAGCTAGTCCAACAGGCTGGAAAGAACTTTGACAGGCATGACAGAAAAAGCCTCGCTTGC Expected duplication
TTTCCTGAGCTAGTCCAACAGGCTGGAAAGAACTTTGACAGGCATGACAGAAAAAGCCTCGCTTGC junction 1
TTTCCTGAGCTAGTCCAACAGGC-----ATGACAGAAAAAGCCTCGCTTGC junction 2
TTTCCTGAGCTAGTCCAACA-----AGCCTCGCTTGC junction 3
```

**D** Duplication of the *Pcdh  $\alpha$  and  $\beta$*  clusters

↓ Duplication junction

```
GCAGATGGCTTCTGAATTGGACAGTGGGCAGAGTCTGGAAATAGATAAGGCCAAAAACCCAGAGATT Expected duplication
GCAGATGGCTTCTGAATTGGACAGTGGGCAGAGTCTGGAAATAGATAAGGCCAAAAACCCAGAGATT junction 1
GCAGATGGCTTCTGAATTGGACAGTGG-----TCTGGAAATAGATAAGGCCAAAAACCCAGAGATT junction 2
GCAGATGGCTTCTGAATTGGACAGTGGGCAGAGTCTGGAAATAGATAAGGCCAAAAACCCAGAGATT junction 3
      A
```

**E** Duplication of the *Pcdh  $\beta$  and  $\gamma$*  clusters

↓ Duplication junction

```
AAAAGCTGCATTTCTGAGCTAGTCCAACAAGTGGTTTTTTTTGAGAGATCTGCCTATTTTTTAAA Expected duplication
AAAAGCTGCATTTCTGAGCTAGTCCAACAAGTGGTTTTTTTTGAGAGATCTGCCTATTTTTTAAA junction 1
AAAAGCTGCATTTCTGAGCTAGTCCAACA-----GAGAGATCTGCCTATTTTTTAAA junction 2
AAAAGCTGCATTTCTGAGCTAGTCCAACAAGTGGTTTTTTTTGAGAGATCTGCCTATTTTTTAAA junction 3
      G
```

**F** Duplication of the *Pcdh  $\alpha$ ,  $\beta$ , and  $\gamma$*  clusters

↓ Duplication junction

```
AAAAGCTGCATTTCTGAGCTAGTCCAACAGTCTGGAAATAGATAAGGCCAAAAACCCAGAGATTTTC Expected duplication
AAAAGCTGCATTTCTGAGCTAGTCCAACA-TCGGAAATAGATAAGGCCAAAAACCCAGAGATTTTC junction 1
AAAAGCTGCATTTCTGAGCTAGTCCA----GTCGGAAATAGATAAGGCCAAAAACCCAGAGATTTTC junction 2
AAAAGCTGCATTTCTGAGCTAGT-----AGATAAGGCCAAAAACCCAGAGATTTTC junction 3
AAAAGCTGCATTTCTGAGCTAGTCCAACAGTCTGGAAATAGATAAGGCCAAAAACCCAGAGATTTTC junction 4
      A
AAAAGCTGCATTTCTGAGCTAGTCCAACAGTCTGGAAATAGATAAGGCCAAAAACCCAGAGATTTTC junction 5
      CAA
AAAAGCTGCATTTCTGAGCTAGTCCA-AGTCTGGAAATAGATAAGGCCAAAAACCCAGAGATTTTC junction 6
      GCTAAGC
AAAAGCTGCATTTCTGAGCTAGTCCAACA-TCGGAAATAGATAAGGCCAAAAACCCAGAGATTTTC junction 7
      AAGTGCTATCTTTGTGATGCTTA
```

**Supplementary Figure S11.** Sequences of duplication junctions of combinatorial duplications of the *Pcdh  $\alpha$ ,  $\beta$ , and  $\gamma$*  gene clusters induced by CRISPR with four sgRNAs. Shown are the sequences of the duplication junctions of the *Pcdh  $\alpha$*  (A),  *$\beta$*  (B),  *$\gamma$*  (C),  *$\alpha/\beta$*  (D),  *$\beta/\gamma$*  (E), and  *$\alpha/\beta/\gamma$*  (F) gene clusters.

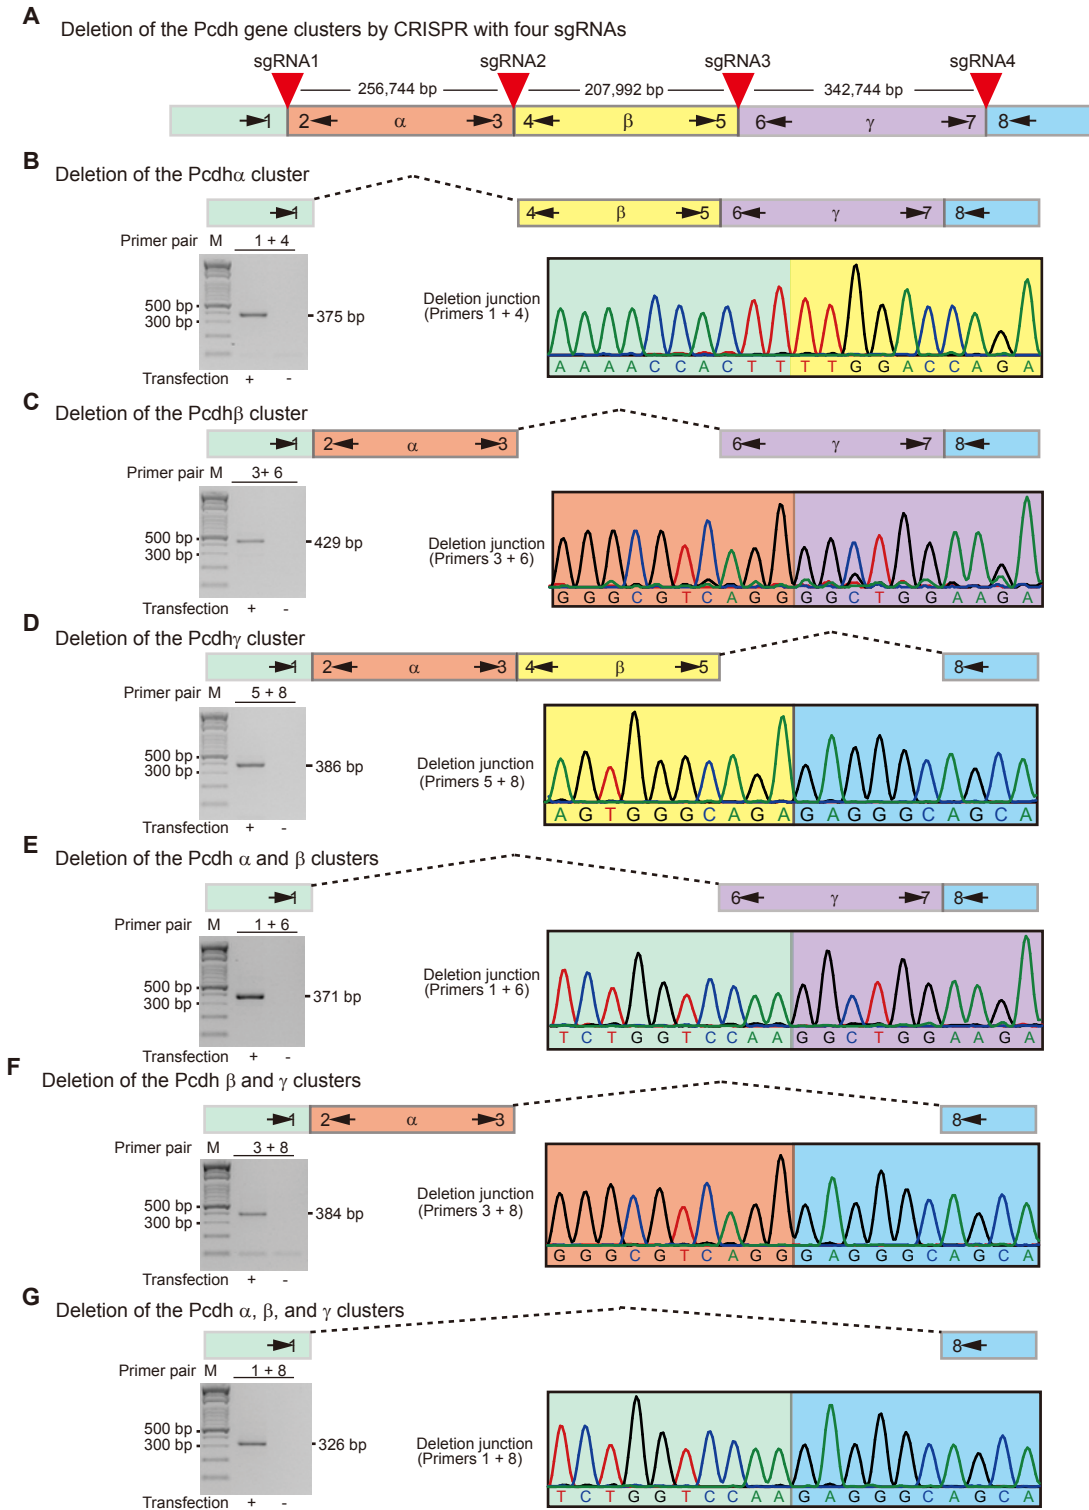

**Supplementary Figure S12.** Combinatorial genomic deletions by CRISPR targeted with four sgRNAs. (A) Diagram of CRISPR with four sgRNAs targeted at the *Pcdh*  $\alpha$ ,  $\beta$ , and  $\gamma$  gene clusters. The examples of PCR gels and sequence chromatograms of the deletion junctions of the *Pcdh*  $\alpha$  (B),  $\beta$  (C),  $\gamma$  (D),  $\alpha/\beta$  (E),  $\beta/\gamma$  (F), and  $\alpha/\beta/\gamma$  (G) gene clusters are shown. Deletion junctions are amplified by PCR with specific primer pairs and confirmed by Sanger sequencing.

**A** Deletion of the *Pcdh $\alpha$*  cluster

```

5' CAAAAAAACCACTTCTCTGACGCCCAATCTTCAATT...256,744 bp...TTTGCCTTATCTATTCCAGACTTGGACCAGAAG 3' WT
5' CAAAAAAACCACTT-----TTGACCAGAAG 3' [-256,744 bp]
5' CAAAAAA-----G 3' [-256,761 bp]
5' CAAAAAAACCACTTC-----GGACCAGAAG 3' [-256,745 bp]
5' CAAAAAAACCACT-----GATT-----3 [-256,812 bp, +4 bp]

```

**B** Deletion of the *Pcdh $\beta$*  cluster

```

5' ATTTGGGCGTCAGGAAGTGGTTTTTTTGAGAGAT...207,992 bp...TGGACAGTGGGCAGAGGCTGGAAGAAGTTTGACAGG 3' WT
5' ATTTGGGCGTCAGG-----GGCTGGAAGAAGTTTGACAGG 3' [-207,992 bp]

```

**C** Deletion of the *Pcdh $\gamma$*  cluster

```

5' GGACAGTGGGCAGAGGCTGGAAGAAGTTTGACAG...342,744 bp...GCTGCATTTCTGAGCTAGTCCAACAGAGGGCAGCA 3' WT
5' GGACAGTGGGCAG-----GAGGGCAGCA 3' [-342,744 bp]
5' GGACAGTGGGCAG-----AGGGCAGCA 3' [-342,745 bp]
5' GGACAGTGGGCAG-----CA 3' [-342,753 bp]
5' -----GGCAGCA 3' [-342,809 bp]
5' GGACAGTGGGCAG-----AGATGGCTGGAAT-----3 [-342,755 bp, +13 bp]

```

**D** Deletion of the *Pcdh $\alpha$*  and  *$\beta$*  clusters

```

5' CTTCGGTCCAAGTCTGGAATAGATAAGGCCAAAA...464,736 bp...TGGACAGTGGGCAGAGGCTGGAAGAAGTTTGACAGG 3' WT
5' CTTCGGTCCAA-----GGCTGGAAGAAGTTTGACAGG 3' [-464,736 bp]
5' CTTCGGTCCA-----GCAAACTGG-----GGCTGGAAGAAGTTTGACAGG 3' [-464,737 bp, +9 bp]
5' CTTCGGTCCAA-----AGGCTGGAAGAAGTTTGACAGG 3' [-464,735 bp]

```

**E** Deletion of the *Pcdh $\beta$*  and  *$\gamma$*  clusters

```

5' ATTTGGGCGTCAGGAAGTGGTTTTTTTGAGAGAT...550,735 bp...GCTGCATTTCTGAGCTAGTCCAACAGAGGGCAGCA 3' WT
5' ATTTGGGCGTCAGG-----GAGGGCAGCA 3' [-550,735 bp]
5' ATTTGGGCGTCAGG-----3 [-550,747 bp]

```

**F** Deletion of the *Pcdh $\alpha$* ,  *$\beta$* , and  *$\gamma$*  clusters

```

5' CTTCGGTCCAAGTCTGGAATAGATAAGGCCAAAA...807,480 bp...GCTGCATTTCTGAGCTAGTCCAACAGAGGGCAGCA 3' WT
5' CTTCGGTCCAA-----GAGGGCAGCA 3' [-807,480 bp]
5' CTTCGGTCCAA-----3 [-807,490 bp]
5' CTTCGGTCCA-----GCA 3' [-807,488 bp]
5' CTTCGGTCCAA-----CAACT-----AGCA 3' [-807,486 bp, +5 bp]

```

**Supplementary Figure S13.** Sequences of deletion junctions of combinatorial genomic deletions of the *Pcdh $\alpha$* ,  *$\beta$* , and  *$\gamma$*  gene clusters induced by CRISPR with four sgRNAs. Shown are the sequences of the deletion junctions of the *Pcdh $\alpha$*  (A),  *$\beta$*  (B),  *$\gamma$*  (C),  *$\alpha/\beta$*  (D),  *$\beta/\gamma$*  (E), and  *$\alpha/\beta/\gamma$*  (F) gene clusters. Both precise and indel junctions are detected.

**A**

Clone H14

|          |                                                                                                                                                                        |
|----------|------------------------------------------------------------------------------------------------------------------------------------------------------------------------|
| WT       | AGTCGACTCGCCCTCTGCTGGTTAAAGATCCGAAT...970 bp...AGTGGATCCACCTGCCACCTGGTGGCAGATGAGG<br>TCAGCTGAGCGGGAGACGACCAATTTCTAGGCTTA...970 bp...TCACCTAGGTGGACGGTGGACCACCGTCTACTCC |
| allele 1 | AGTCGACTCGCCCT-----GCTGGTTAAA <sup>^</sup> -----GATCCACT...970 bp...ATTTCGGA-----AAAGTGGAAAA <sup>^</sup> -----GTGGCAGATGAGG                                           |
| allele 2 | AGTCGACTCGCCCTC-----Deletion (1,009 bp)-----TGGTGGCAGATGAGG                                                                                                            |
| allele 3 | AGT-----GGTTAAAGATCCGAAT...970 bp...AGTGGATCCACCTGCCAC-- <sup>^</sup> -----GCAGATGAGG                                                                                  |

  

**B**

mice F23

|          |                                                                                                                                                                               |
|----------|-------------------------------------------------------------------------------------------------------------------------------------------------------------------------------|
| WT       | CTGTGCGCTGCAATCCTGCCACTACAACCTTCTAGG...1,241 bp...TTTAGTCATCAATAGTCGGTCTTTTGGAGATCTCC<br>GACACGCGACGTTAGGACGGTGATGTTGAAGATCC...1,241 bp...AAATCAGTAGTTATCAGCCAGAAAACCTCTAGAGG |
| allele 1 | CTGTGCGCTGCAATCCTGCCACTACAACCTTCTAGGCTTGCT.....-----Deletion (473 bp)-----                                                                                                    |
| allele 2 | CTGTGCGCTGCAATCCTGCCACTACAACCTTCTAGGCTTGCT.....TTTAGTCATCAATAGTCGGTCTTTTGGAGATCTCC<br><sup>^</sup>                                                                            |

  

mice F24

|          |                                                                                                                                                                               |
|----------|-------------------------------------------------------------------------------------------------------------------------------------------------------------------------------|
| WT       | CTGTGCGCTGCAATCCTGCCACTACAACCTTCTAGG...1,241 bp...TTTAGTCATCAATAGTCGGTCTTTTGGAGATCTCC<br>GACACGCGACGTTAGGACGGTGATGTTGAAGATCC...1,241 bp...AAATCAGTAGTTATCAGCCAGAAAACCTCTAGAGG |
| allele 1 | CTGTGCGCTGCAATCCTGCCA----- <sup>^</sup> -----TTTGGAGATCTCC                                                                                                                    |
| allele 2 | CTGTGCGCTGCAATCCT-----GGAGATCTCC                                                                                                                                              |

**Supplementary Figure S14.** Cell clone and F1 mice by CRISPR. (A) Hec-1-B single-cell subclone of H14 screened by CRISPR with a pair of sgRNAs. Shown are sequences of the three alleles of the H14 CRISPR cell line. (B) F1 mice with deletion. Shown are sequences of the two alleles of F23 and F24 mice.

## Supplementary Tables

### Supplementary Table S1. Sequences of oligos used.

Oligos used for constructing sgRNAs

| DNA fragment                                   | sgRNAs | Direction                               | Sequence                                |
|------------------------------------------------|--------|-----------------------------------------|-----------------------------------------|
| <i>Pcdh</i> RE1                                | sgRNA1 | F                                       | ACCGCCACACATCCAAGGCTGAC                 |
|                                                |        | R                                       | AAACGTCAGCCTTGGATGTGTGG                 |
|                                                | sgRNA2 | F                                       | ACCGAGATTTGGGGCGTCAGGAAG                |
|                                                |        | R                                       | AAACCTTCCTGACGCCCCAAATCT                |
| <i>Pcdh</i> RE2                                | sgRNA1 | F                                       | ACCGGACAGCGACACCGCCAGTT                 |
|                                                |        | R                                       | AAACAAC TGGGCGGTGTCGCTGTC               |
|                                                | sgRNA2 | F                                       | ACCGGTGGCCATGGTGTGCTGAACTC              |
|                                                |        | R                                       | AAACGAGTTCAGCACCATGGCCAC                |
| $\beta$ -globin RE1                            | sgRNA1 | F                                       | ACCGATTTGTTGCTGCCTTGGAGTG               |
|                                                |        | R                                       | AAACCACTCCAAGGCAACAACAAT                |
|                                                | sgRNA2 | F                                       | ACCGCTGGTCCCCTGGTAACCTGG                |
|                                                |        | R                                       | AAACCCAGGTTACCAGGGGACCAG                |
| $\beta$ -globin RE2                            | sgRNA1 | F                                       | ACCGACCAATGACCTCAGGCTGT                 |
|                                                |        | R                                       | AAACACAGCCTGAGGTGATTGGGT                |
|                                                | sgRNA2 | F                                       | ACCGTCACTTGTAGCGGCATCTG                 |
|                                                |        | R                                       | AAACCAGATGCCGCTAACAAGTGA                |
| <i>HoxD</i> locus                              | sgRNA1 | F                                       | ACCGGGGCGAGGGGTTGGTCTT                  |
|                                                |        | R                                       | AAACAAGACCAACCCCTCGCCCC                 |
|                                                | sgRNA2 | F                                       | ACCGACCTCGAAAGTCATAAACC                 |
|                                                |        | R                                       | AAACGGTTTATGACTTTCGAGGT                 |
| $\beta$ -globin locus                          | sgRNA1 | F                                       | GCTTCAACACTGCCATCTCCGTTTTAGAGCTAGAAATAG |
|                                                |        | R                                       | GGAGATGGCAGTGTGAAGCGGTGTTTCGTCCTTTCCAC  |
|                                                | sgRNA2 | F                                       | GAACTACTTCTGACCCCTAGGTTTTAGAGCTAGAAATAG |
|                                                |        | R                                       | CTAGGGGTCAGAAGTAGTTCGGTGTTCGTCCTTTCCAC  |
| <i>Pcdha</i> cluster                           | sgRNA1 | F                                       | ACCGGCTTCTTCTGGTCCAAGTC                 |
|                                                |        | R                                       | AAACGACTTGGACCAGAAGAAGC                 |
|                                                | sgRNA2 | F                                       | ACCGAGATTTGGGGCGTCAGGAAG                |
|                                                |        | R                                       | AAACCTTCCTGACGCCCCAAATCT                |
| <i>Pcdha</i> , $\beta$ , and $\gamma$ clusters | sgRNA1 | F                                       | ACCGGCTTCTTCTGGTCCAAGTC                 |
|                                                |        | R                                       | AAACGACTTGGACCAGAAGAAGC                 |
|                                                | sgRNA2 | F                                       | GTGGTTGTGCTGCCCTCTGTGTTTTAGAGCTAGAAATAG |
|                                                |        | R                                       | ACAGAGGGCAGCAACAACCACGGTGTTCGTCCTTTCCAC |
| <i>Pcdh</i> clusters with four sgRNAs          | sgRNA1 | F                                       | ACCGGCTTCTTCTGGTCCAAGTC                 |
|                                                |        | R                                       | AAACGACTTGGACCAGAAGAAGC                 |
|                                                | sgRNA2 | F                                       | ACCGAGATTTGGGGCGTCAGGAAG                |
|                                                |        | R                                       | AAACCTTCCTGACGCCCCAAATCT                |
|                                                | sgRNA3 | F                                       | ACCGATGGACAGTGGGCAGAGGC                 |
|                                                |        | R                                       | AAACGCCTCTGCCCACTGTCCAAT                |
| sgRNA4                                         | F      | GTGGTTGTGCTGCCCTCTGTGTTTTAGAGCTAGAAATAG |                                         |



|                       |        |   |                                                                |
|-----------------------|--------|---|----------------------------------------------------------------|
|                       |        | R | ACAGAGGGCAGCAACAACCACGGTGTTCGTCCTTTCCAC                        |
| m <i>Pcdh</i> locus 1 | sgRNA1 | F | TAATACGACTCACTATAGGGCAGCTGTCTCGCCCTCTGCGTT<br>TTAGAGCTAGAAATAG |
|                       |        | R | AAAAGCACCGACTCGGTGCC                                           |
|                       | sgRNA2 | F | TAATACGACTCACTATAGGATCGAACACCAGGTGGCAGAGTT<br>TTAGAGCTAGAAATAG |
|                       |        | R | AAAAGCACCGACTCGGTGCC                                           |
| m <i>Pcdh</i> locus 2 | sgRNA1 | F | TAATACGACTCACTATAGGAGCCTAGAAGTTGTAGTGGCGTT<br>TTAGAGCTAGAAATAG |
|                       |        | R | AAAAGCACCGACTCGGTGCC                                           |
|                       | sgRNA2 | F | TAATACGACTCACTATAGGGTCATCAATAGTCGGTCTTTGTT<br>TTAGAGCTAGAAATAG |
|                       |        | R | AAAAGCACCGACTCGGTGCC                                           |
| m <i>Pcdh</i> locus 3 | sgRNA1 | F | TAATACGACTCACTATAGGGACAGACATAGTCGCTTTGCCGT<br>TTAGAGCTAGAAATAG |
|                       |        | R | AAAAGCACCGACTCGGTGCC                                           |
|                       | sgRNA2 | F | TAATACGACTCACTATAGGGCTAAGAGAGGCCGATACGTTTT<br>AGAGCTAGAAATAG   |
|                       |        | R | AAAAGCACCGACTCGGTGCC                                           |
| <i>Pcdh</i> enhancer  | sgRNA1 | F | GCAGTCGACTCGCCCTCTGCGTTTTAGAGCTAGAAATAG                        |
|                       |        | R | GCAGAGGGCAGTCGACTGCGGTGTTCGTCCTTTCCAC                          |
|                       | sgRNA2 | F | GTGGATCCACCTGCCACCTGGGTTTTAGAGCTAGAAATAG                       |
|                       |        | R | CCAGGTGGCAGGTGGATCCACGGTGTTCGTCCTTTCCAC                        |

### Primers used for identifying inversions, duplications, and deletions

| DNA fragment        |      | Direction            | Sequence                     |
|---------------------|------|----------------------|------------------------------|
| <i>Pcdh</i> RE1     | Del  | F1                   | TTCATCCCCGCTTCCTACTG         |
|                     |      | R2                   | CACTCTGATAGTTTATGTATTAGGCTTG |
|                     | InvF | F1                   | TTCATCCCCGCTTCCTACTG         |
|                     |      | F2                   | CTTGAACCAGTTGGGATTG          |
|                     | InvR | R1                   | TTCCGTACCATATGGATTGCTT       |
|                     |      | R2                   | CACTCTGATAGTTTATGTATTAGGCTTG |
| Dup                 | F2   | CGAGTCATGGGACCGAACTG |                              |
|                     | R1   | TAACCAGCAGAGGGCGAGTC |                              |
| <i>Pcdh</i> RE2     | Del  | F1                   | CTTGAACCAGTTGGGATTG          |
|                     |      | R2                   | TTATCAATAGCATTTTCCTCATCTG    |
|                     | InvF | F1                   | CAAATGTAGTCCGTCCAGTG         |
|                     |      | F2                   | GTCGCTGTCCGTGGCCAT           |
|                     | InvR | R1                   | CATGGCCACGGACAGCGAC          |
|                     |      | R2                   | TTATCAATAGCATTTTCCTCATCTG    |
| $\beta$ -globin RE1 | Del  | F1                   | GTTCTCCTTGTATTAACAGACCTG     |
|                     |      | R2                   | CAGCTCTGCCTGAAAGGAGTC        |
|                     | InvF | F1                   | GTTCTCCTTGTATTAACAGACCTG     |

|                                  |      |                           |                            |
|----------------------------------|------|---------------------------|----------------------------|
|                                  |      | F2                        | AGATTGAGTTCTGTTTGTTCATCTAC |
|                                  | InvR | R1                        | TTTTATGAAAGCAGCCTCTTGAG    |
|                                  |      | R2                        | CAGCTCTGCCTGAAAGGAGTC      |
| <i>β-globin</i> RE2              | Del  | F1                        | AGGTGAATGAATGCGTGACTG      |
|                                  |      | R2                        | GCACAGCCCTGCTCTATTACG      |
|                                  | InvF | F1                        | CTGCCTCTTATGGGTCTAATGTAC   |
|                                  |      | F2                        | CTGGTCCTGATTCTTCCTCACTC    |
|                                  | InvR | R1                        | AGAGCCACCAGTCCACAGATC      |
|                                  |      | R2                        | GCACAGCCCTGCTCTATTACG      |
| Dup                              | F2   | ATAGCAATGAAATCTTGAGGAGTG  |                            |
|                                  | R1   | ACGCAGGAGCCGTATCATG       |                            |
| <i>HoxD</i> locus                | Del  | F1                        | GTTGTGGTTCTCCGTTGCCTC      |
|                                  |      | R2                        | CCCAGGCATAGAGACTCACTCG     |
|                                  | InvF | F1                        | GTTGTGGTTCTCCGTTGCCTC      |
|                                  |      | F2                        | ACCGCCCTCACTGTTGATC        |
|                                  | InvR | R1                        | TCCGCTCACCAGATAACTACG      |
|                                  |      | R2                        | CATCCTATTTTCGAGGAGCTGC     |
| <i>β-globin</i> locus            | Del  | F1                        | GATGTACTGTT TCACCTCCACTTG  |
|                                  |      | R2                        | TGTTCTTACCTCTTCAGCCATC     |
|                                  | InvF | F1                        | TAAAGCCAGCCATTTCTAAGG      |
|                                  |      | F2                        | ATTCCCTGTGTGATTACTTGCTTAC  |
|                                  | InvR | R1                        | CAAATAAGTGAGAACGAGATAAACC  |
|                                  |      | R2                        | TGTTCTTACCTCTTCAGCCATC     |
| Dup                              | F2   | CAGTGGAGTTTTTGCTGTTCTTAG  |                            |
|                                  | R1   | CAAATAAGTGAGAACGAGATAAACC |                            |
| <i>Pcdhα</i> cluster             | Del  | F1                        | TGCTAGGCTGCCTATTTCCCTG     |
|                                  |      | R2                        | TTTTTGGCTAACAACATAGTGCTTC  |
|                                  | InvF | F1                        | TGCTAGGCTGCCTATTTCCCTG     |
|                                  |      | F2                        | CTTGGAACCCAGTTGGGATTG      |
|                                  | InvR | R1                        | GAGAACATTGTCAACATTTGGAAGT  |
|                                  |      | R2                        | TTTTTGGCTAACAACATAGTGCTTC  |
| Dup                              | F2   | CTTGGAACCCAGTTGGGATTG     |                            |
|                                  | R1   | GAGAACATTGTCAACATTTGGAAGT |                            |
| <i>Pcdh α, β, and γ</i> clusters | Del  | F1                        | GGATTCCCTATTAACAGCTTTGC    |
|                                  |      | R2                        | CTGTTTGAGTGTGTATTGGATTG    |
|                                  | InvF | F1                        | GGATTCCCTATTAACAGCTTTGC    |
|                                  |      | F2                        | CCCATGTTTTAGTGTTC AATTTGG  |
|                                  | InvR | R1                        | GAAAGCCTAAATCCTTGT TACTTG  |
|                                  |      | R2                        | CTGTTTGAGTGTGTATTGGATTG    |
| Dup                              | F2   | CCCATGTTTTAGTGTTC AATTTGG |                            |
|                                  | R1   | GAAAGCCTAAATCCTTGT TACTTG |                            |
| <i>mPcdh</i> locus 1             | Del  | F1                        | CAATGGAGGCAATCCCTTCTG      |
|                                  |      | R2                        | GGTGGTAGTGAGGGATTATTCTAG   |

|                       |                    |                         |                           |
|-----------------------|--------------------|-------------------------|---------------------------|
|                       | InvF (blastocysts) | F1                      | AGGTAAGTGCAGCCCTGTATCC    |
|                       |                    | F2                      | GTTCCCTTTGTCAGGTGAAAATCTC |
|                       | InvR (blastocysts) | R1                      | AAACGAATGCCTCCTCTGC       |
|                       |                    | R2                      | GGGTGGTAGTGAGGGATTATTCTAG |
|                       | InvF (mice)        | F1                      | CAATGGAGGCAATCCCTTCTG     |
|                       |                    | F2                      | GTTCCCTTTGTCAGGTGAAAATCTC |
|                       | InvR (mice)        | R1                      | AGGTAGAGCTAAAGACTCGTGGTG  |
|                       |                    | R2                      | GGGTGGTAGTGAGGGATTATTCTAG |
|                       | Dup (mice)         | F2                      | GTTCCCTTTGTCAGGTGAAAATCTC |
|                       |                    | R1                      | AGGTAGAGCTAAAGACTCGTGGTG  |
| F1                    |                    | AGGTAAGTGCAGCCCTGTATCC  |                           |
| R2                    |                    | TGACCATCAAGATTGCTTTCACA |                           |
| m <i>Pcdh</i> locus 2 | Del                | F1                      | CAATGGAGGCAATCCCTTCTG     |
|                       |                    | R2                      | GGGTGGTAGTGAGGGATTATTCTAG |
|                       | InvF               | F1                      | AGGTAAGTGCAGCCCTGTATCC    |
|                       |                    | F2                      | GTTCCCTTTGTCAGGTGAAAATCTC |
|                       | InvR               | R1                      | AGGTAGAGCTAAAGACTCGTGGTG  |
|                       |                    | R2                      | GGGTGGTAGTGAGGGATTATTCTAG |
| m <i>Pcdh</i> locus 3 | Del                | F1                      | TATTCTTCAGCCCTGCAACC      |
|                       |                    | R2                      | ACAGGACACTACTCCGTGGT      |
|                       | InvF               | F1                      | AGCCAGACCAGCATAGCAAAT     |
|                       |                    | F2                      | ACAGGATAATGGGTCTGGAGC     |
|                       | InvR               | R1                      | CCAAGCCCACAGTCGTTGAT      |
|                       |                    | R2                      | TCCAGATTACGAGCTGAGCG      |

Primers used for identifying inversions, duplications, and deletions with four sgRNAs

|                                      |                              |                           |                           |                           |
|--------------------------------------|------------------------------|---------------------------|---------------------------|---------------------------|
| Pcdh clusters<br>with four<br>sgRNAs | <i>Pcdh</i> $\alpha$ cluster | Del                       | 1                         | TGCTAGGCTGCCTATTTCTG      |
|                                      |                              |                           | 4                         | TTTTTGGCTAACAACATAGTGCTTC |
|                                      |                              | InvF                      | 1                         | TGCTAGGCTGCCTATTTCTG      |
|                                      |                              |                           | 3                         | CTTGGAACCAGTTGGGATTG      |
|                                      |                              | InvR                      | 2                         | GAGAACATTGTCAACATTTGGAAGT |
|                                      |                              |                           | 4                         | TTTTTGGCTAACAACATAGTGCTTC |
|                                      | Dup                          | 3                         | CTTGGAACCAGTTGGGATTG      |                           |
|                                      |                              | 2                         | GAGAACATTGTCAACATTTGGAAGT |                           |
|                                      | <i>Pcdh</i> $\beta$ cluster  | Del                       | 3                         | CTTGGAACCAGTTGGGATTG      |
|                                      |                              |                           | 6                         | GTTTCTCCAACATGCTCCTCAC    |
|                                      |                              | InvF                      | 3                         | CTTGGAACCAGTTGGGATTG      |
|                                      |                              |                           | 5                         | GACTTGTCAGCCACGTTTCA      |
|                                      |                              | InvR                      | 4                         | TTTTTGGCTAACAACATAGTGCTTC |
|                                      |                              |                           | 6                         | GTTTCTCCAACATGCTCCTCAC    |
| Dup                                  | 5                            | GACTTGTCAGCCACGTTTCA      |                           |                           |
|                                      | 4                            | TTTTTGGCTAACAACATAGTGCTTC |                           |                           |
| <i>Pcdh</i> $\gamma$ cluster         | Del                          | 5                         | AAGCAGAGTTGAGTCTTCCGTG    |                           |

|     |                                                        |                         |                          |                           |
|-----|--------------------------------------------------------|-------------------------|--------------------------|---------------------------|
|     |                                                        | InvF                    | 8                        | CTGTTTGAGTGTGTATTGGATTC   |
|     |                                                        |                         | 5                        | AAGCAGAGTTGAGTCTTCCGTG    |
|     |                                                        | InvR                    | 7                        | CCCATGTTTGTAGTGTCAATTGG   |
|     |                                                        |                         | 6                        | TCCTCATTTCTGCACCCTCAC     |
|     |                                                        | Dup                     | 8                        | CTGTTTGAGTGTGTATTGGATTC   |
|     |                                                        |                         | 7                        | CCCATGTTTGTAGTGTCAATTGG   |
|     | <i>Pcdh</i> $\alpha$ and $\beta$ clusters              | Del                     | 6                        | GTTTCTCCAACATGCTCCTCAC    |
|     |                                                        |                         | 1                        | GGATTCCTCATTAACAGCTTTGC   |
|     |                                                        | InvF                    | 5                        | GACTTGCCAGCCACGTTTCA      |
|     |                                                        |                         | 1                        | TGCTAGGCTGCCTATTTCTTG     |
|     |                                                        | InvR                    | 6                        | GTTTCTCCAACATGCTCCTCAC    |
|     |                                                        |                         | 2                        | GAGAACATTGTCAACATTTGGAAGT |
|     | Dup                                                    | 5                       | GACTTGCCAGCCACGTTTCA     |                           |
|     |                                                        | 2                       | GAAAGCCTAAATCCTTGTACTTG  |                           |
|     | <i>Pcdh</i> $\beta$ and $\gamma$ clusters              | Del                     | 8                        | CTGTTTGAGTGTGTATTGGATTC   |
|     |                                                        |                         | 3                        | CTTGAACCAGTTGGGATTG       |
|     |                                                        | InvF                    | 7                        | CCCATGTTTGTAGTGTCAATTGG   |
|     |                                                        |                         | 3                        | CTTGAACCAGTTGGGATTG       |
|     |                                                        | InvR                    | 8                        | CTGTTTGAGTGTGTATTGGATTC   |
|     |                                                        |                         | 4                        | TTTTTGGCTAACACATAGTGCTTC  |
|     | Dup                                                    | 7                       | CCCATGTTTGTAGTGTCAATTGG  |                           |
|     |                                                        | 4                       | TTTTTGGCTAACACATAGTGCTTC |                           |
|     | <i>Pcdh</i> $\alpha$ , $\beta$ , and $\gamma$ clusters | Del                     | 8                        | CTGTTTGAGTGTGTATTGGATTC   |
|     |                                                        |                         | 1                        | GGATTCCTCATTAACAGCTTTGC   |
|     |                                                        | InvF                    | 7                        | CCCATGTTTGTAGTGTCAATTGG   |
|     |                                                        |                         | 1                        | GGATTCCTCATTAACAGCTTTGC   |
|     |                                                        | InvR                    | 8                        | CTGTTTGAGTGTGTATTGGATTC   |
|     |                                                        |                         | 2                        | GAAAGCCTAAATCCTTGTACTTG   |
| Dup | 7                                                      | CCCATGTTTGTAGTGTCAATTGG |                          |                           |
|     | 2                                                      | GAAAGCCTAAATCCTTGTACTTG |                          |                           |

### Primers used for quantitative PCR for measuring efficiency

| Targeted locus                       |     | Direction | Sequence                   |
|--------------------------------------|-----|-----------|----------------------------|
| <i><math>\beta</math>-globin</i> RE1 | Del | F1        | GTTCCCTCCTTGATTAAACAGACCTG |
|                                      |     | R2        | CAGCTCTGCCTGAAAGGAGTC      |
|                                      | Inv | F1        | GTTCCCTCCTTGATTAAACAGACCTG |
|                                      |     | F2        | AGATTGAGTTCTGTTTGTTCATCTAC |
|                                      | WT  | F2        | AGATTGAGTTCTGTTTGTTCATCTAC |
|                                      |     | R2        | CAGCTCTGCCTGAAAGGAGTC      |
| <i>Pcdh</i> RE1                      | Del | F1        | TTCATCCCCGCTTCCTACTG       |
|                                      |     | R2        | TTTTTGGCTAACACATAGTGCTTC   |
|                                      | Inv | R1        | TTCCGTACCATATGGATTGCTT     |

|                                  |     |                            |                            |
|----------------------------------|-----|----------------------------|----------------------------|
|                                  |     | R2                         | TTTTTGGCTAACAAACATAGTGCTTC |
|                                  | Dup | F2                         | CGAGTCATGGGACCGAACTG       |
|                                  |     | R1                         | TAACCAGCAGAGGGCGAGTC       |
|                                  | WT  | F1                         | TTCATCCCCGCTTCCTACTG       |
|                                  |     | R1                         | TTCCGTACCATATGGATTGCTT     |
| <i>β-globin</i> RE2              | Del | F1                         | AGGTTGAATGAATGCGTGACTG     |
|                                  |     | R2                         | GCACAGCCCTGCTCTATTACG      |
|                                  | Inv | F1                         | CTGCCTCTTTATGGGTCTAATGTAC  |
|                                  |     | F2                         | CTGGTCTGATTCTTCCTCACTC     |
|                                  | Dup | F2                         | ATAGCAATGAAATCTTGAAGGAGTG  |
|                                  |     | R1                         | ACGCAGGAGCCGTATCATG        |
| WT                               | F2  | CTGGTCTGATTCTTCCTCACTC     |                            |
|                                  | R2  | GCACAGCCCTGCTCTATTACG      |                            |
| <i>HoxD</i> locus                | Del | F1                         | GTTGTGGTTCTCCGTTGCTTC      |
|                                  |     | R2                         | CCCAGGCATAGAGACTCACTCG     |
|                                  | Inv | F1                         | GTTGTGGTTCTCCGTTGCTTC      |
|                                  |     | F2                         | ACCGCCCTTCACTGTTGATC       |
|                                  | WT  | F1                         | TGAAAGAACGTTGCCACCTC       |
|                                  |     | R1                         | GAAGGGAACCTGCTCCGAA        |
| <i>β-globin</i> locus            | Del | F1                         | GATGTACTGTTTCACCTCCACTTG   |
|                                  |     | R2                         | TGTTCTTACCTCTTCAGCCATC     |
|                                  | Inv | F1                         | TAAAGCCAGCCATTTCTAAGG      |
|                                  |     | F2                         | CAGTGGAGTTTTTGCTGTTCTTAG   |
|                                  | Dup | F2                         | CAGTGGAGTTTTTGCTGTTCTTAG   |
|                                  |     | R1                         | CAAATAAGTGAGAACGAGATAAACC  |
| WT                               | F1  | GATGTACTGTTTCACCTCCACTTG   |                            |
|                                  | R1  | CAAATAAGTGAGAACGAGATAAACC  |                            |
| <i>Pcdhα</i> cluster             | Del | F1                         | GGATTCCCTCATTAACAGCTTTGC   |
|                                  |     | R2                         | TTTTTGGCTAACAAACATAGTGCTTC |
|                                  | Inv | R1                         | GAGAACATTGTCAACATTTGGAAGT  |
|                                  |     | R2                         | TTTTTGGCTAACAAACATAGTGCTTC |
|                                  | Dup | F2                         | CTTGGAAACCAGTTGGGATTG      |
|                                  |     | R1                         | GAGAACATTGTCAACATTTGGAAGT  |
| WT                               | F1  | GGATTCCCTCATTAACAGCTTTGC   |                            |
|                                  | R1  | GAGAACATTGTCAACATTTGGAAGT  |                            |
| <i>Pcdh α, β, and γ</i> clusters | Del | F1                         | GGATTCCCTCATTAACAGCTTTGC   |
|                                  |     | R2                         | CTGTTTGAGTGTGTATTGGATTC    |
|                                  | Inv | F1                         | GGATTCCCTCATTAACAGCTTTGC   |
|                                  |     | F2                         | CCCATGTTTTAGTGTTC AATTTGG  |
|                                  | Dup | F2                         | CCCATGTTTTAGTGTTC AATTTGG  |
|                                  |     | R1                         | GAAAGCCTAAATCCTTGT TACTTG  |
| WT                               | F2  | CCCATGTTTTAGTGTTC AATTTGG  |                            |
|                                  | R2  | CTTGTCATGATCTAGGA ACTTATTC |                            |

Primers used for quantitative PCR for measuring efficiency with four sgRNAs

|                                        |                                    |                           |                            |                            |
|----------------------------------------|------------------------------------|---------------------------|----------------------------|----------------------------|
| Pcdh clusters<br>with four<br>sgRNAs   | Pcdh $\alpha$ cluster              | Del                       | F1                         | GGATTCCTCATTAACAGCTTTGC    |
|                                        |                                    |                           | R2                         | TTTTTGGCTAACAAACATAGTGCTTC |
|                                        |                                    | Inv                       | R1                         | GAGAACATTGTCAACATTTGGAAGT  |
|                                        |                                    |                           | R2                         | TTTTTGGCTAACAAACATAGTGCTTC |
|                                        |                                    | Dup                       | F2                         | CTTGAACCAGTTGGGATTG        |
|                                        |                                    |                           | R1                         | GAGAACATTGTCAACATTTGGAAGT  |
|                                        | WT                                 | F1                        | GGATTCCTCATTAACAGCTTTGC    |                            |
|                                        |                                    | R1                        | GAGAACATTGTCAACATTTGGAAGT  |                            |
|                                        | Pcdh $\beta$ cluster               | Del                       | F1                         | CGAGTCATGGGACCGAACTG       |
|                                        |                                    |                           | R2                         | GTTTCTCCAACATGCTCCTCAC     |
|                                        |                                    | Inv                       | F1                         | CTTGAACCAGTTGGGATTG        |
|                                        |                                    |                           | F2                         | GACTTGTCAGCCACGTTTCA       |
|                                        |                                    | Dup                       | F2                         | GACTTGTCAGCCACGTTTCA       |
|                                        |                                    |                           | R1                         | TTTTTGGCTAACAAACATAGTGCTTC |
|                                        | WT                                 | F2                        | GACTTGTCAGCCACGTTTCA       |                            |
|                                        |                                    | R2                        | GTTTCTCCAACATGCTCCTCAC     |                            |
|                                        | Pcdh $\gamma$ cluster              | Del                       | F1                         | GACTTGTCAGCCACGTTTCA       |
|                                        |                                    |                           | R2                         | CTTGTCATGATCTAGGAACCTTATTC |
|                                        |                                    | Inv                       | R1                         | TCCTCATTCTGCACCCTCAC       |
|                                        |                                    |                           | R2                         | CTGTTTGAGTGTGTATTGGATTTC   |
|                                        |                                    | Dup                       | F2                         | CCCATGTTTTAGTGTTCAATTTGG   |
|                                        |                                    |                           | R1                         | GTTTCTCCAACATGCTCCTCAC     |
|                                        | WT                                 | F1                        | GACTTGTCAGCCACGTTTCA       |                            |
|                                        |                                    | R1                        | GTTTCTCCAACATGCTCCTCAC     |                            |
|                                        | Pcdh $\alpha$ and $\beta$ clusters | Del                       | F1                         | AAGTATTGGGATTCCTCATTAACAG  |
|                                        |                                    |                           | R2                         | TCCTCATTCTGCACCCTCAC       |
|                                        |                                    | Inv                       | F1                         | TGCTAGGCTGCCTATTTCTCTG     |
|                                        |                                    |                           | F2                         | GACTTGTCAGCCACGTTTCA       |
|                                        |                                    | Dup                       | F2                         | GACTTGTCAGCCACGTTTCA       |
|                                        |                                    |                           | R1                         | GAGAACATTGTCAACATTTGGAAGT  |
| WT                                     | F2                                 | GACTTGTCAGCCACGTTTCA      |                            |                            |
|                                        | R2                                 | GTTTCTCCAACATGCTCCTCAC    |                            |                            |
| Pcdh $\beta$ and $\gamma$ clusters     | Del                                | F1                        | CGAGTCATGGGACCGAACTG       |                            |
|                                        |                                    | R2                        | CTGTTTGAGTGTGTATTGGATTTC   |                            |
|                                        | Inv                                | F1                        | CTTGAACCAGTTGGGATTG        |                            |
|                                        |                                    | F2                        | CCCATGTTTTAGTGTTCAATTTGG   |                            |
|                                        | Dup                                | F2                        | CCCATGTTTTAGTGTTCAATTTGG   |                            |
|                                        |                                    | R1                        | TTTTTGGCTAACAAACATAGTGCTTC |                            |
| WT                                     | F2                                 | CCCATGTTTTAGTGTTCAATTTGG  |                            |                            |
|                                        | R2                                 | CAAACAAGGAGAATGATGAAAGTGG |                            |                            |
| Pcdh $\alpha$ , $\beta$ , and $\gamma$ | Del                                | F1                        | GGATTCCTCATTAACAGCTTTGC    |                            |

|  |          |                            |                           |                          |
|--|----------|----------------------------|---------------------------|--------------------------|
|  | clusters |                            | R2                        | CTGTTTGAGTGTTGTATTGGATTC |
|  |          | Inv                        | R1                        | GGATTCCTCATTAACAGCTTTGC  |
|  | Dup      |                            | R2                        | CCCATGTTTTAGTGTTCAATTTGG |
|  |          | WT                         | F2                        | CCCATGTTTTAGTGTTCAATTTGG |
|  | R1       |                            | GAAAGCCTAAATCCTTGTTTACTTG |                          |
|  | R2       | CTTGTCATGATCTAGGAACCTTATTC |                           |                          |

### Primers used for off-target analyses

| DNA fragment          | sgRNAs | Direction | Sequence                |
|-----------------------|--------|-----------|-------------------------|
| <i>Pcdh</i> RE1       | sgRNA1 | OTF       | TCCTGGAACACGGATTTATGC   |
|                       |        | OTR       | TGTTCTCCTTTCCCTTTGTGAG  |
| $\beta$ -globin RE1   | sgRNA1 | OTF       | CTCAACCTCCCAAGTTGGATC   |
|                       |        | OTR       | GAGAGGTGATGTGGAGGTGAGTG |
|                       | sgRNA2 | OTF       | GCCTACTGTGACTGTGGCAATG  |
|                       |        | OTR       | CCACGCTACATTCACCCATC    |
| $\beta$ -globin RE2   | sgRNA1 | OTF       | GGAGGGCTGGGAAGTGCA      |
|                       |        | OTR       | GGGCATCCATGGTTGTCTG     |
|                       | sgRNA2 | OTF       | CATTCAAGGTAATAACTCACTGG |
|                       |        | OTR       | CACCCTCAACATTTCCACAAG   |
| <i>HoxD</i> locus     | sgRNA1 | OTF       | CAGAGCCTCCAGCAGTCCCTAC  |
|                       |        | OTR       | GAGGCACCCATACCAGAAGC    |
|                       | sgRNA2 | OTF       | AGAAGCGCCCATTGAAAGAG    |
|                       |        | OTR       | TTTCAGTTCAGAAATCCCGTC   |
| $\beta$ -globin locus | sgRNA1 | OTF       | CCATCTGGGGATAGGTTGTTC   |
|                       |        | OTR       | GCTTACGGTGTTCCTCCATC    |
|                       | sgRNA2 | OTF       | CATCCCATTCTATCAACCAGG   |
|                       |        | OTR       | AAAAATAGGCTGGAGCAAGTCC  |

### Primers used for quantitative RT-PCR of gene expression of the *Pcdh* gene clusters

| Gene name                         | Direction | Sequence                 |
|-----------------------------------|-----------|--------------------------|
| <i>hPcdh<math>\alpha</math>6</i>  | F         | GATGGGTAAGGCGGAGAATC     |
|                                   | R         | AGGTCCAGCTGTTGCTGTTGAC   |
| <i>hPcdh<math>\alpha</math>12</i> | F         | CAAGCCTTCAGCTGTCTCGA     |
|                                   | R         | AGGTCCAGCTGTTGCTGTTGAC   |
| <i>hPcdh<math>\alpha</math>1</i>  | F         | CTTGCCACTGGGGTAGGACTG    |
|                                   | R         | AGGTCCAGCTGTTGCTGTTGAC   |
| <i>hPcdh<math>\alpha</math>2</i>  | F         | AGGCCAAAGTGGTCAGAATG     |
|                                   | R         | AGGTCCAGCTGTTGCTGTTGAC   |
| <i>hPcdh<math>\beta</math>3</i>   | F         | TGTCTTCAGTAAACAGCCCTATTC |
|                                   | R         | TCACTCTTCCGTTGTCTCCAG    |
| <i>hPcdh<math>\beta</math>9</i>   | F         | ATTCCAATGACAATCCTCCTG    |
|                                   | R         | TAAAAACAGCCAATACTATCCCAG |

|                  |   |                          |
|------------------|---|--------------------------|
| <i>hPcdhβ15</i>  | F | GCTCTGTCTCTGTTAAGGTGCTG  |
|                  | R | GAGTCTCGGTCTCTAATCCTAAAC |
| <i>hPcdhγb5</i>  | F | CGACTTCCCATCCTGAGTTG     |
|                  | R | CGACTTCTTCTGTGGCCATTG    |
| <i>hPcdhγa10</i> | F | CCTTTGTCTTTGTTAGATGATTCG |
|                  | R | CGACTTCTTCTGTGGCCATTG    |
| <i>hGAPDH</i>    | F | GGAGTCCACTGGCGTCTTCAC    |
|                  | R | GCAGGAGGCATTGCTGATGAT    |

**Supplementary Table S2. List of sgRNA targeting sequences**

| DNA fragment          | sgRNA  | Species | Chr | Genomic coordinates (hg19 or mm9) | Sequence              |
|-----------------------|--------|---------|-----|-----------------------------------|-----------------------|
| <i>Pcdh</i> RE1       | sgRNA1 | Human   | 5   | 140419774-140419793               | GCCACACATCCAAGGCTGAC  |
|                       | sgRNA2 | Human   | 5   | 140421046-140421065               | AGATTTGGGGCGTCAGGAAG  |
| <i>Pcdh</i> RE2       | sgRNA1 | Human   | 5   | 140420832-140420851               | GACAGCGACACCGCCCAGTT  |
|                       | sgRNA2 | Human   | 5   | 140420853-140420872               | GTGGCCATGGTCTGAACTC   |
| <i>β-globin</i> RE1   | sgRNA1 | Human   | 11  | 4093748-4093767                   | ATTGTTGTTGCCTGGAGTG   |
|                       | sgRNA2 | Human   | 11  | 4094457-4094476                   | CTGGTCCCCTGGTAACCTGG  |
| <i>β-globin</i> RE2   | sgRNA1 | Human   | 11  | 4203109-4203128                   | ACCCAATGACCTCAGGCTGT  |
|                       | sgRNA2 | Human   | 11  | 4209386-4209405                   | TCACTTGTAGCGGCATCTG   |
| <i>HoxD</i> locus     | sgRNA1 | Human   | 2   | 176944510-176944529               | GGGGCGAGGGGTTGGTCTT   |
|                       | sgRNA2 | Human   | 2   | 176962653-176962672               | GACCTCGAAAGTCATAAACC  |
| <i>β-globin</i> locus | sgRNA1 | Human   | 11  | 5145473-5145492                   | GCTTCAACACTGCCATCTCC  |
|                       | sgRNA2 | Human   | 11  | 5226196-5226215                   | GAACTACTTCTGACCCCTAG  |
| <i>Pcdh</i> cluster   | sgRNA1 | Human   | 5   | 140164302-140164321               | GGCTTCTTCTGGTCCAAGTC  |
|                       | sgRNA2 | Human   | 5   | 140421046-140421065               | AGATTTGGGGCGTCAGGAAG  |
|                       | sgRNA3 | Human   | 5   | 140629038-140629057               | ATTGGACAGTGGGCAGAGGC  |
|                       | sgRNA4 | Human   | 5   | 140971774-140971793               | TGGTTGTTGCTGCCCTCTGT  |
| <i>mPcdh</i> locus 1  | sgRNA1 | Mouse   | 18  | 37217457-37217476                 | GCAGCTGTCTCGCCCTCTGC  |
|                       | sgRNA2 | Mouse   | 18  | 37218428-37218447                 | TCTGCCACCTGGTGTTCGAT  |
| <i>mPcdh</i> locus 2  | sgRNA1 | Mouse   | 18  | 37217321-37217340                 | GCCACTACAACCTCTAGGCT  |
|                       | sgRNA2 | Mouse   | 18  | 37218551-37218570                 | GTCATCAATAGTCGGTCTTT  |
| <i>mPcdh</i> locus 3  | sgRNA1 | Mouse   | 18  | 38011468-38011487                 | GGCAAAGCGACTATGTCTGT  |
|                       | sgRNA2 | Mouse   | 18  | 38040855-38040874                 | GGGCTAAGAGAGGCCGATAC  |
| <i>Pcdh</i> enhancer  | sgRNA1 | Human   | 5   | 140419937-140419956               | GCAGTCGACTCGCCCTCTGC  |
|                       | sgRNA2 | Human   | 5   | 140420945-140420965               | GTGGATCCACCTGCCACCTGG |



**Supplementary Table S3. Potential off-target sites for sgRNAs.**

| DNA fragment                             | sgRNAs                                   | Sequence                                          | Coordinate                |
|------------------------------------------|------------------------------------------|---------------------------------------------------|---------------------------|
| <i>Pcdh</i> RE1                          | sgRNA1                                   | GCCACACATCCAAGGCTGACAGG                           | chr5:140419774-140419796  |
|                                          |                                          | <u>G</u> TAGGCATCCAAGGCTGACAGG                    | chr5:73541775-73541797    |
|                                          |                                          | <u>AGGAGAA</u> ATCCAAGGCTGACAGG                   | chr16:29283392-29283414   |
|                                          |                                          | <u>AGGAGAA</u> ATCCAAGGCTGACAGG                   | chr16:88279138-88279160   |
|                                          | sgRNA2                                   | AGATTTGGGGCGTCAGGAAGTGG                           | chr5:140421046-140421068  |
|                                          |                                          | not found                                         |                           |
| <i>β-globin</i> RE1                      | sgRNA1                                   | ATTGTTGTTGCCTTGGAGTGGGG                           | chr11:4093748-4093770     |
|                                          |                                          | <u>T</u> TT <u>TAC</u> GTTCCTTGGAGT <u>G</u> AGG  | chr3:194529587-194529609  |
|                                          |                                          | <u>AGCCCAT</u> TTGCCTTGGAGT <u>T</u> G            | chr10:61769557-61769579   |
|                                          |                                          | <u>CACAGCC</u> TTGCCTTGGAGT <u>A</u> GG           | chr12:105794596-105794618 |
|                                          | sgRNA2                                   | CTGGTCCCCTGGTAACCTGGTGG                           | chr11:4094457-4094479     |
|                                          | <u>AGACATT</u> CCTGGTAACCTGG <u>C</u> GG | chr4:10135619-10135641                            |                           |
| <i>β-globin</i> RE2                      | sgRNA1                                   | ACCCAATGACCTCAGGCTGTAGG                           | chr11:4203109-4203131     |
|                                          |                                          | <u>T</u> CC <u>AAGG</u> GACCTCAGGCTGT <u>G</u> GG | chr1:35225451-35225473    |
|                                          |                                          | <u>AGGCCGG</u> GACCTCAGGCTGT <u>G</u> GG          | chr7:155175311-155175333  |
|                                          |                                          | <u>TCTTGG</u> TGACCTCAGGCTGT <u>G</u> GG          | chr11:72538049-72538071   |
|                                          |                                          | <u>TGTCTC</u> TGACCTCAGGCTGTAGG                   | chr22:29823268-29823290   |
|                                          | sgRNA2                                   | TCACTTGTAGCGGCATCTGTGG                            | chr11:4209386-4209408     |
|                                          |                                          | <u>TAGGATT</u> TTAGCGGCATCTGTGG                   | chr1:200714321-200714343  |
|                                          |                                          | <u>AGGATG</u> TTAGCGGCATCTGTGG                    | chr16:5293528-5293550     |
| <u>CAAAA</u> ATTAGCGGCATCTGTGG           |                                          | chr17:47146780-47146802                           |                           |
| <i>HoxD</i> locus                        | sgRNA1                                   | GGGGCGAGGGGTTGGTCTTTGG                            | chr2:176944510-176944532  |
|                                          |                                          | <u>ATCTGGA</u> AGGGGTTGGTCTT <u>A</u> GG          | chr1:227824834-227824856  |
|                                          |                                          | <u>GCCCA</u> AGGGGTTGGTCTT <u>G</u> GG            | chr3:119470371-119470393  |
|                                          |                                          | <u>CAAGTG</u> GAGGGGTTGGTCTT <u>G</u> GG          | chr15:90131233-90131255   |
|                                          |                                          | <u>AGACCC</u> CAGGGGTTGGTCTT <u>G</u> GG          | chr16:5612529-5612551     |
|                                          | sgRNA2                                   | GACCTCGAAAGTCATAAACCCGG                           | chr2:176962653-176962675  |
|                                          |                                          | <u>CAGAGT</u> CAAAGTCATAAACCT <u>T</u> GG         | chr4:165699237-165699259  |
|                                          |                                          | <u>AAAGC</u> CGAAAGTCATAAAC <u>C</u> AGG          | chr18:103855897-103855919 |
| <u>AACATC</u> AAAAGTCATAAAC <u>C</u> AGG |                                          | chrX:89642974-89642996                            |                           |
| <i>β-globin</i> locus                    | sgRNA1                                   | CCAGGAGATGGCAGTGTGAAGC                            | chr11:5145473-5145495     |
|                                          |                                          | CCGGGAGATGGCAGT <u>GCTGGGA</u>                    | chr1:15136268-15136290    |
|                                          |                                          | CCAGGAGATGGCAGTGT <u>TGCA</u>                     | chr1:64140255-64140277    |
|                                          |                                          | CCAGGAGATGGCAGTGT <u>TCCT</u>                     | chr1:175121340-175121362  |
|                                          |                                          | CCCGGAGATGGCAGT <u>AGCCTG</u>                     | chr1:227603760-227603782  |
|                                          |                                          | C <u>T</u> GGAGATGGCAGT <u>GA</u> CTTAT           | chr4:123855569-123855591  |
|                                          |                                          | C <u>T</u> GGAGATGGCAGTGT <u>GTGT</u>             | chr4:183176777-183176799  |
|                                          |                                          | CCAGGAGATGGCAGT <u>GGA</u> AAGT                   | chr5:73832096-73832118    |
|                                          |                                          | CCAGGAGATGGCAGT <u>GGG</u> AAA                    | chr7:6546692-6546714      |
| CCAGGAGATGGCAGTGT <u>TCTGA</u>           | chr7:12428914-12428936                   |                                                   |                           |

|                                        |           |                          |                          |
|----------------------------------------|-----------|--------------------------|--------------------------|
|                                        |           | CCTGGAGATGGCAGTGGATCCCA  | chr10:20603816-20603838  |
|                                        |           | CCAGGAGATGGCAGTGTGAGAC   | chr12:70273334-70273356  |
|                                        |           | CCAGGAGATGGCAGTGGCAGCCA  | chr16:88882589-88882611  |
|                                        |           | CCTGGAGATGGCAGTGTTCGAGA  | chr17:71503217-71503239  |
|                                        | sgRNA2    | CCACTAGGGGTCAGAAGTAGTTC  | chr11:5226196-5226218    |
|                                        |           | CCCTAGGGGTCAGAAAAGCCTTT  | chr3:73189890-73189912   |
| <i>Pcdh<math>\alpha</math></i> cluster |           | CCACTAGGGGTCAGAAATTACACA | chr18:41710505-41710527  |
|                                        | sgRNA1    | GGCTTCTTCTGGTCCAAGTCTGG  | chr5:140164302-140164324 |
|                                        |           | ATGGAGTTCTGGTCCAAGTCTGG  | chr1:84516811-84516833   |
|                                        |           | GGTAATACTGGTCCAAGTCTGG   | chr3:197017861-197017883 |
|                                        |           | CCATTAACTGGTCCAAGTCAAGG  | chr15:78053927-78053949  |
|                                        | sgRNA2    | AGATTTGGGGCGTCAGGAAGTGG  | chr5:140421046-140421068 |
|                                        | not found |                          |                          |

**Supplementary Table S4.** Off-target analyses by PCR and sequencing.

| DNA fragment                           | sgRNAs | Sequence                | Coordinate               | Indel mutation |
|----------------------------------------|--------|-------------------------|--------------------------|----------------|
| <i>Pcdh</i> RE1                        | sgRNA1 | GTAGGCCATCCAAGGCTGACAGG | chr5:73541775-73541797   | Not found      |
| <i><math>\beta</math>-globin</i> RE1   | sgRNA1 | TTTACGTTCCTTGGAGTGAGG   | chr3:194529587-194529609 | Not found      |
|                                        | sgRNA2 | AGACATTCCTGGTAACCTGGCGG | chr4:10135619-10135641   | Not found      |
| <i><math>\beta</math>-globin</i> RE2   | sgRNA1 | TGTCCTGACCTCAGGCTGTAGG  | chr22:29823268-29823290  | Not found      |
|                                        | sgRNA2 | AGGATGGTTAGCGCATCTGTGG  | chr16:5293528-5293550    | Not found      |
| <i>HoxD</i> locus                      | sgRNA1 | AGACCCCAGGGGTTGGTCTTGGG | chr16:5612529-5612551    | Not found      |
|                                        | sgRNA2 | AACATCAAAAGTCATAAACCAGG | chrX:89642974-89642996   | Not found      |
| <i><math>\beta</math>-globin</i> locus | sgRNA1 | CCAGGAGATGGCAGTGTGAGAC  | chr12:70273334-70273356  | Not found      |
|                                        | sgRNA2 | CCACTAGGGGTCAGAATTACACA | chr18:41710505-41710527  | Not found      |

**Supplementary Table S5.** The efficiency of inversions, duplications, and deletions by CRISPR with four sgRNAs

| Efficiency (%) | <i>Pcdh<math>\alpha</math></i> cluster | <i>Pcdh<math>\beta</math></i> cluster | <i>Pcdh<math>\gamma</math></i> cluster | <i>Pcdh <math>\alpha</math> and <math>\beta</math></i> clusters | <i>Pcdh <math>\beta</math> and <math>\gamma</math></i> clusters | <i>Pcdh <math>\alpha</math>, <math>\beta</math>, and <math>\gamma</math></i> clusters |
|----------------|----------------------------------------|---------------------------------------|----------------------------------------|-----------------------------------------------------------------|-----------------------------------------------------------------|---------------------------------------------------------------------------------------|
| Inversion      | 3.474                                  | 8.178                                 | 5.488                                  | 8.574                                                           | 4.597                                                           | 0.550                                                                                 |
| Duplication    | 2.381                                  | 4.180                                 | 2.250                                  | 0.834                                                           | 6.347                                                           | 0.228                                                                                 |
| Deletion       | 4.048                                  | 11.904                                | 6.154                                  | 20.989                                                          | 5.871                                                           | 0.318                                                                                 |

**Supplementary Table S6.** The efficiency of inversions, duplications, and deletions by CRISPR for screening single-cell clones

| DNA fragment         | Length    | Total clones | Inversion clones | Inversion efficiency (%) | Duplication clones | Duplication efficiency (%) | Deletion clones | Deletion efficiency (%) |
|----------------------|-----------|--------------|------------------|--------------------------|--------------------|----------------------------|-----------------|-------------------------|
| <i>β-globin</i> RE1  | 709 bp    | 78           | 38               | 48.72                    | 0                  | 0                          | 46              | 58.97                   |
| <i>Pcdh</i> enhancer | 1,272 bp  | 32           | 4                | 12.50                    | ND                 | /                          | 12              | 37.50                   |
| <i>β-globin</i> RE2  | 6,277 bp  | 62           | 31               | 50.00                    | 1                  | 1.61                       | 45              | 72.58                   |
| <i>HoxD</i> locus    | 18,142 bp | 112          | 1                | 0.89                     | ND                 | /                          | 4               | 3.57                    |

ND: not determined.
